# Supplementary material
Source: publisher figshare collection journal article supplement (https://acs.figshare.com/ndownloader/files/4133062)
Supplement: Supplementary file 1 [file 4133062]

# Effects of Ortho Substituent Groups of Protocatechualdehyde Derivatives on Binding to the C1 Domain of Novel Protein Kinase C

Narsimha Mamidi, Rituparna Borah, Narayan Sinha, Chandramohan Jana, and Debasis Manna\*

Department of Chemistry, Indian Institute of Technology Guwahati, Assam 781039, India

## Table of Content

| Sl. No | Content                                                                                                                        | Page |
|--------|--------------------------------------------------------------------------------------------------------------------------------|------|
| 1.     | Figure S1: $^1\text{H}$ NMR (A) and $^{13}\text{C}$ NMR (B) of 4-hydroxyphenyl palmitate (1a).                                 | 3    |
| 2.     | Figure S2: $^1\text{H}$ NMR (A) and $^{13}\text{C}$ NMR (B) of 4-hydroxyphenyl octanoate (1b).                                 | 4    |
| 3.     | Figure S3: $^1\text{H}$ NMR (A) and $^{13}\text{C}$ NMR (B) of 3-hydroxyphenyl palmitate (2a).                                 | 5    |
| 4.     | Figure S4: $^1\text{H}$ NMR (A) and $^{13}\text{C}$ NMR (B) of 3-hydroxyphenyl octanoate (2b).                                 | 6    |
| 5.     | Figure S5: $^1\text{H}$ NMR (A) and $^{13}\text{C}$ NMR (B) of 4-(hydroxymethyl)phenyl palmitate (3a).                         | 7    |
| 6.     | Figure S6: $^1\text{H}$ NMR (A) and $^{13}\text{C}$ NMR (B) of 4-(hydroxymethyl)phenyl octanoate (3b).                         | 8    |
| 7.     | Figure S7: $^1\text{H}$ NMR (A) and $^{13}\text{C}$ NMR (B) of 3-(hydroxymethyl)phenyl palmitate (4a).                         | 9    |
| 8.     | Figure S8: $^1\text{H}$ NMR (A) and $^{13}\text{C}$ NMR (B) of 3-(hydroxymethyl)phenyl octanoate (4b).                         | 10   |
| 9.     | Figure S9: $^1\text{H}$ NMR (A) and $^{13}\text{C}$ NMR (B) of 4-(hydroxymethyl)-2-(hexadecanoyloxy)phenyl palmitate (5a).     | 11   |
| 10.    | Figure S10: $^1\text{H}$ NMR (A) and $^{13}\text{C}$ NMR (B) of 4-(hydroxymethyl)-2-(octanoyloxy)phenyl octanoate (5b).        | 12   |
| 11.    | Figure S11: $^1\text{H}$ NMR (A) and $^{13}\text{C}$ NMR (B) of 2-(Z)-(octadec-9-enoyloxy)-4-(hydroxymethyl)phenyl oleate (6). | 13   |
| 12.    | Figure S12: $^1\text{H}$ NMR (A) and $^{13}\text{C}$ NMR (B) of 2-acetoxy-4-(hydroxymethyl)phenyl palmitate (7a).              | 14   |
| 13.    | Figure S13: $^1\text{H}$ NMR (A) and $^{13}\text{C}$ NMR (B) of 2-acetoxy-4-(hydroxymethyl)phenyl octanoate (7b).              | 15   |
| 14.    | Figure S14: $^1\text{H}$ NMR (A) and $^{13}\text{C}$ NMR (B) of 5-(hydroxymethyl)-2-(palmitoyloxy)phenyl benzoate (8a).        | 16   |
| 15.    | Figure S15: $^1\text{H}$ NMR (A) and $^{13}\text{C}$ NMR (B) of 5-(hydroxymethyl)-2-(octanoyloxy)phenyl benzoate (8b).         | 17   |

|     |                                                                                                                                                                                                   |    |
|-----|---------------------------------------------------------------------------------------------------------------------------------------------------------------------------------------------------|----|
| 16. | Figure S16: $^1\text{H}$ NMR ( <b>A</b> ) and $^{13}\text{C}$ NMR ( <b>B</b> ) of 4-(hydroxy methyl)-2-methoxyphenyl palmitate ( <b>9a</b> ).                                                     | 18 |
| 17. | Figure S17: $^1\text{H}$ NMR ( <b>A</b> ) and $^{13}\text{C}$ NMR ( <b>B</b> ) of 4-(hydroxy methyl)-2-methoxyphenyl octanoate ( <b>9b</b> ).                                                     | 17 |
| 18. | Figure S18: $^1\text{H}$ NMR ( <b>A</b> ) and $^{13}\text{C}$ NMR ( <b>B</b> ) of 5-(hydroxymethyl)-2-methoxyphenyl palmitate ( <b>10a</b> ).                                                     | 20 |
| 19. | Figure S19: $^1\text{H}$ NMR ( <b>A</b> ) and $^{13}\text{C}$ NMR ( <b>B</b> ) of 5-(hydroxymethyl)-2-methoxyphenyl octanoate ( <b>10b</b> ).                                                     | 21 |
| 20. | Figure S20: $^1\text{H}$ NMR ( <b>A</b> ) and $^{13}\text{C}$ NMR ( <b>B</b> ) of 2-tert-butoxy-4-(hydroxymethyl)phenyl palmitate ( <b>11a</b> ).                                                 | 22 |
| 21. | Figure S21: $^1\text{H}$ NMR ( <b>A</b> ) and $^{13}\text{C}$ NMR ( <b>B</b> ) of 2-tert-butoxy-4-(hydroxymethyl)phenyl octanoate ( <b>11b</b> ).                                                 | 23 |
| 22. | Figure S22: $^1\text{H}$ NMR ( <b>A</b> ) and $^{13}\text{C}$ NMR ( <b>B</b> ) of 2-(benzyloxy)-4-(hydroxymethyl)phenyl palmitate ( <b>12a</b> ).                                                 | 24 |
| 23. | Figure S23: $^1\text{H}$ NMR ( <b>A</b> ) and $^{13}\text{C}$ NMR ( <b>B</b> ) of 2-(benzyloxy)-4-(hydroxymethyl)phenyl octanoate ( <b>12b</b> ).                                                 | 25 |
| 24. | Figure S24: $^1\text{H}$ NMR ( <b>A</b> ) and $^{13}\text{C}$ NMR ( <b>B</b> ) of 4-formyl-2-hydroxyphenyl palmitate.                                                                             | 26 |
| 25. | Figure S25: $^1\text{H}$ NMR ( <b>A</b> ) and $^{13}\text{C}$ NMR ( <b>B</b> ) of 4-formyl-2-hydroxyphenyl octanoate.                                                                             | 27 |
| 26. | Figure S26: $^1\text{H}$ NMR ( <b>A</b> ) & $^{13}\text{C}$ NMR ( <b>B</b> ) of 4-(hydroxymethyl)-2-[(5Z,8Z,11Z,14Z)-icosa-5,8,11,14-tetraenoxy]phenyl(5Z,8Z,11Z,14Z)-icosa-5,8,11,14-tetraenoate | 28 |
| 27. | Figure S27: Mass spectrum of compound <b>1a</b> and <b>1b</b> .                                                                                                                                   | 29 |
| 28. | Figure S28: Mass spectrum of compound <b>2a</b> and <b>2b</b> .                                                                                                                                   | 30 |
| 29. | Figure S29: Mass spectrum of compound <b>3a</b> and <b>3b</b> .                                                                                                                                   | 31 |
| 30. | Figure S30: Mass spectrum of compound <b>4a</b> and <b>4b</b> .                                                                                                                                   | 32 |
| 31. | Figure S31: Mass spectrum of compound <b>5a</b> and <b>5b</b> .                                                                                                                                   | 33 |
| 32. | Figure S32: Mass spectrum of compound <b>6</b> .                                                                                                                                                  | 34 |
| 33. | Figure S33: Mass spectrum of compound <b>7a</b> and <b>7b</b> .                                                                                                                                   | 35 |
| 34. | Figure S34: Mass spectrum of compound <b>8a</b> and <b>8b</b> .                                                                                                                                   | 36 |
| 35. | Figure S35: Mass spectrum of compound <b>9a</b> and <b>9b</b> .                                                                                                                                   | 37 |
| 36. | Figure S36: Mass spectrum of 4-formyl-2-hydroxyphenyl palmitate and 4-formyl-2-hydroxyphenyl octanoate.                                                                                           | 38 |
| 37. | Figure S37: Mass spectrum of compound <b>10a</b> and <b>10b</b> .                                                                                                                                 | 39 |
| 38. | Figure S38: Mass spectrum of compound <b>11a</b> and <b>11b</b> .                                                                                                                                 | 40 |
| 39. | Figure S39: Mass spectrum of compound <b>12a</b> and <b>12b</b> .                                                                                                                                 | 41 |

# NMR spectra of the synthesized compounds

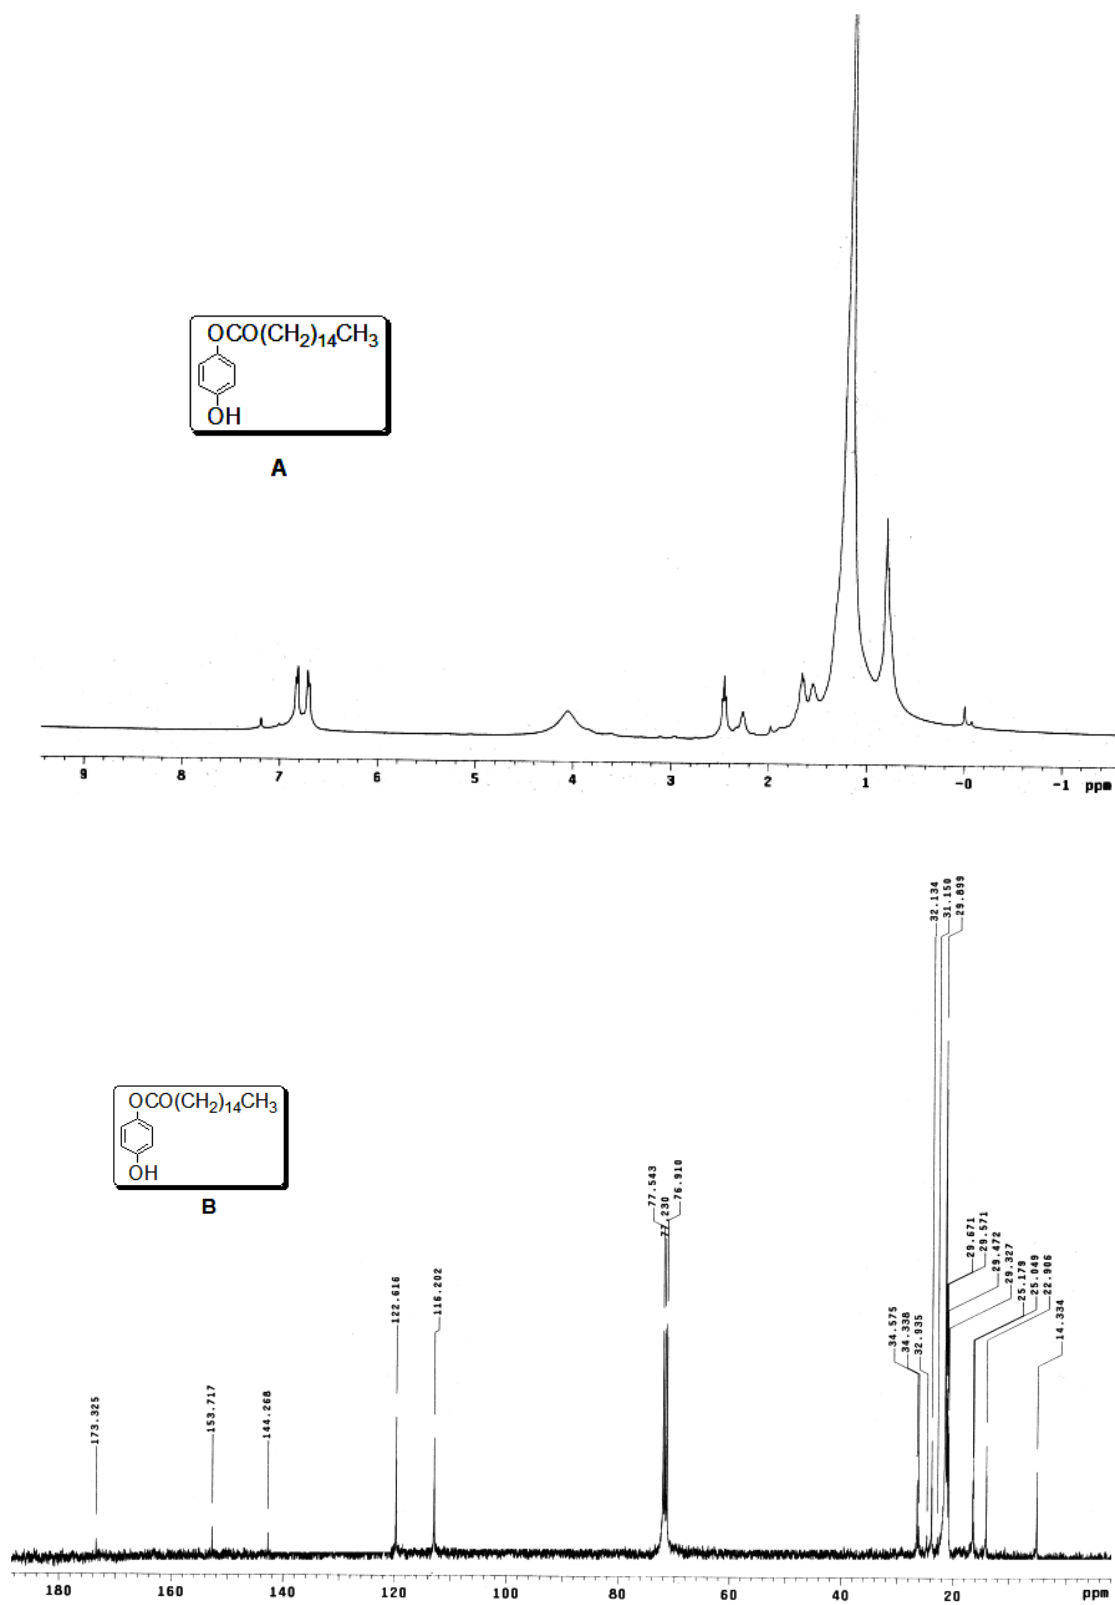

**Figure S1:** <sup>1</sup>H NMR (A) and <sup>13</sup>C NMR (B) of 4-hydroxyphenyl palmitate (**1a**).

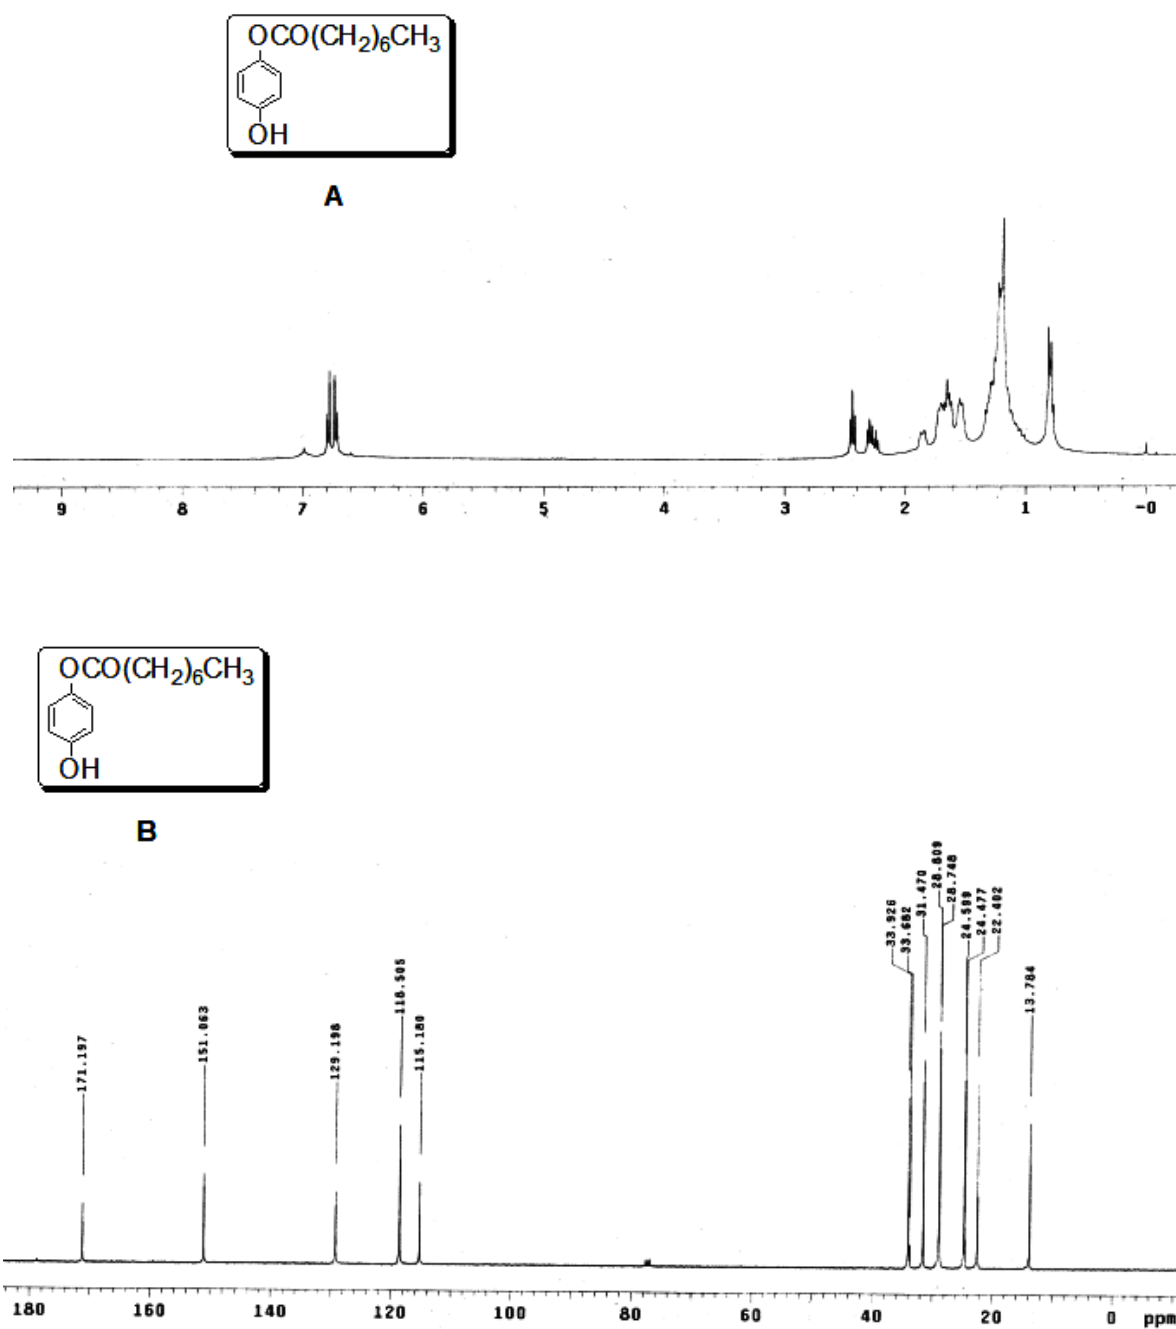

**Figure S2:** <sup>1</sup>H NMR (**A**) and <sup>13</sup>C NMR (**B**) of 4-hydroxyphenyl octanoate (**1b**).

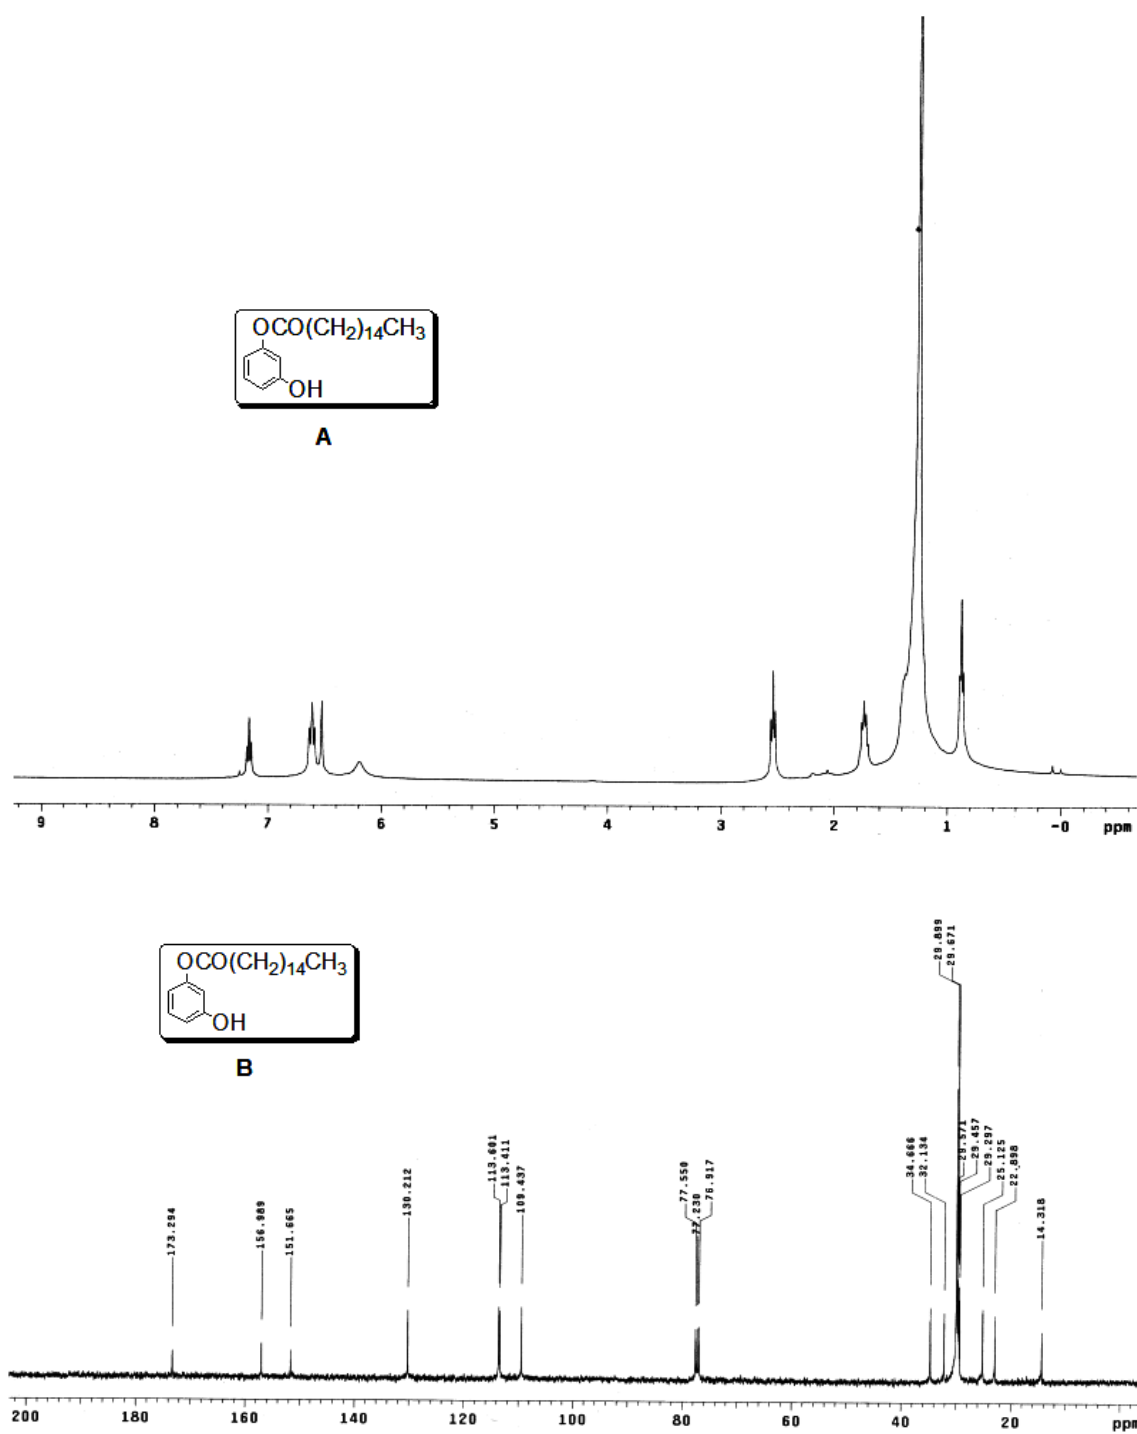

**Figure S3:**  $^1\text{H}$  NMR (**A**) and  $^{13}\text{C}$  NMR (**B**) of 3-hydroxyphenyl palmitate (**2a**).

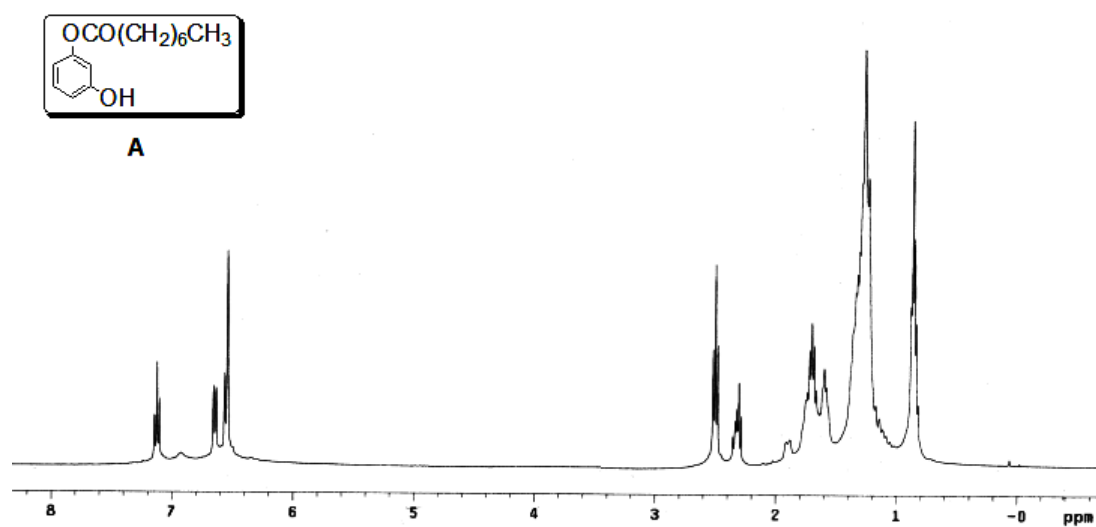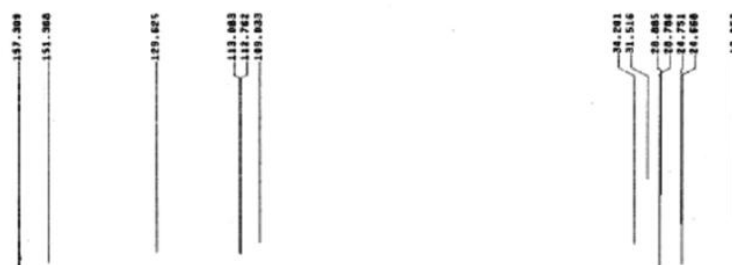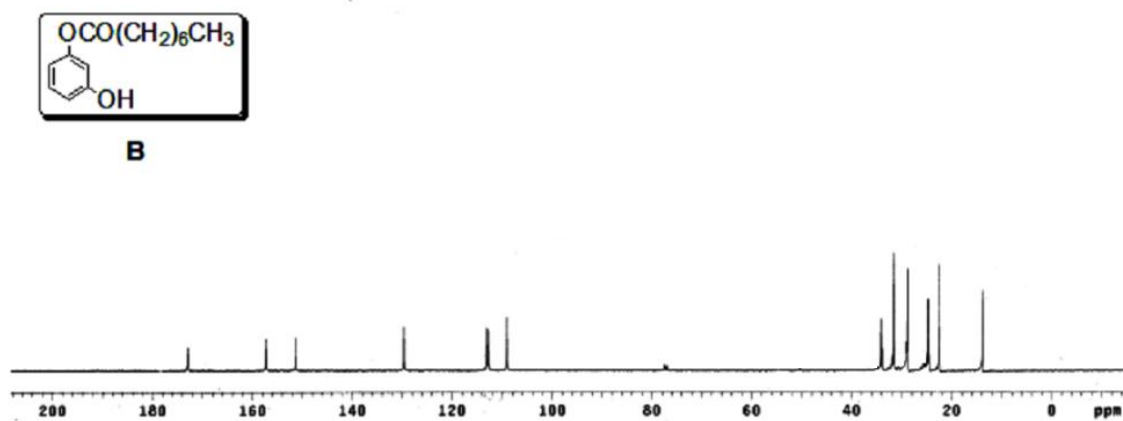

**Figure S4:**  $^1\text{H}$  NMR (**A**) and  $^{13}\text{C}$  NMR (**B**) of 3-hydroxyphenyl octanoate (**2b**).

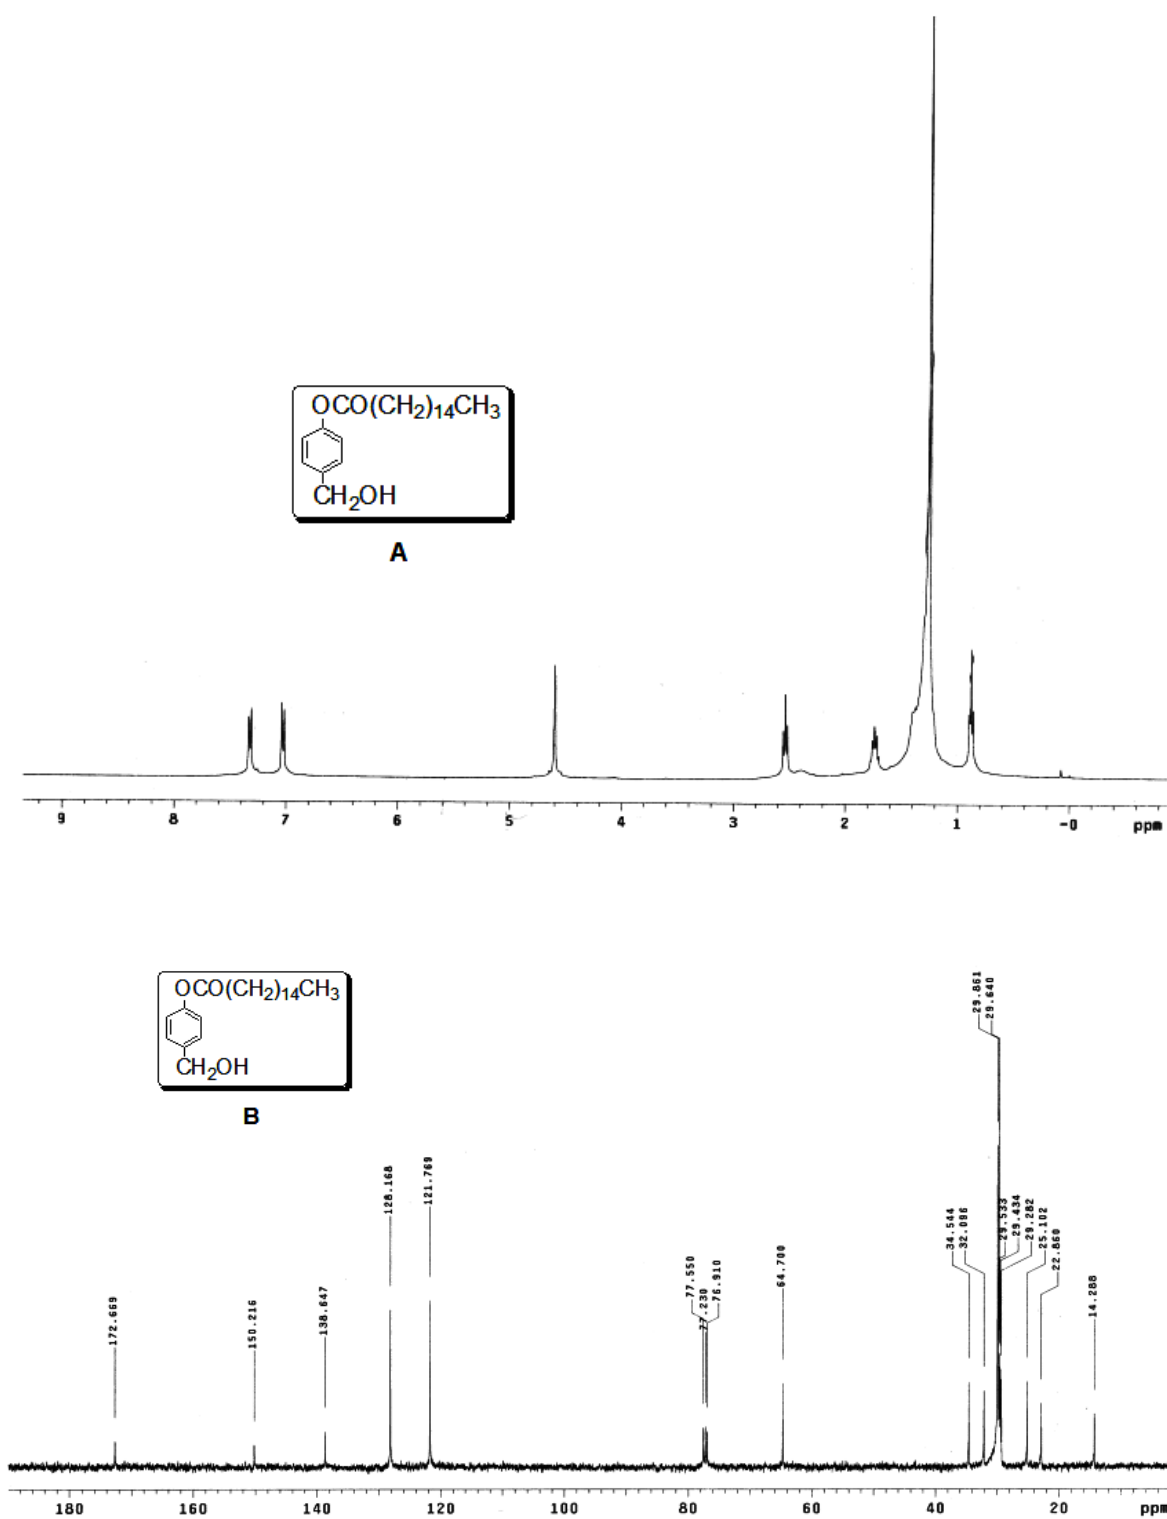

**Figure S5:**  $^1\text{H}$  NMR (**A**) and  $^{13}\text{C}$  NMR (**B**) of 4-(hydroxymethyl)phenyl palmitate (**3a**).

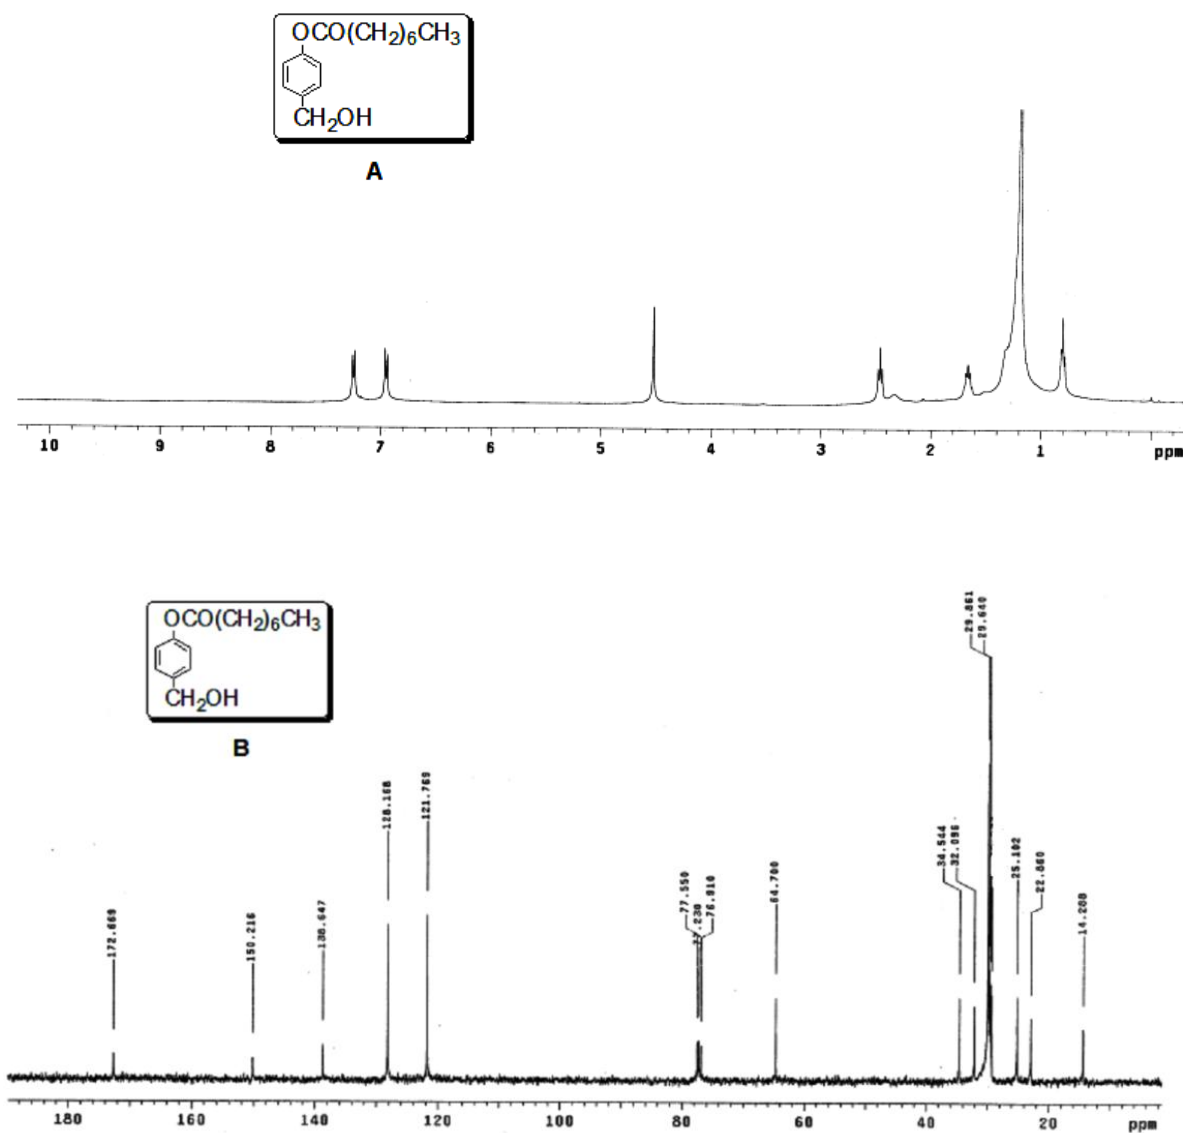

**Figure S6:**  $^1\text{H}$  NMR (**A**) and  $^{13}\text{C}$  NMR (**B**) of 4-(hydroxymethyl)phenyl octanoate (**3b**).



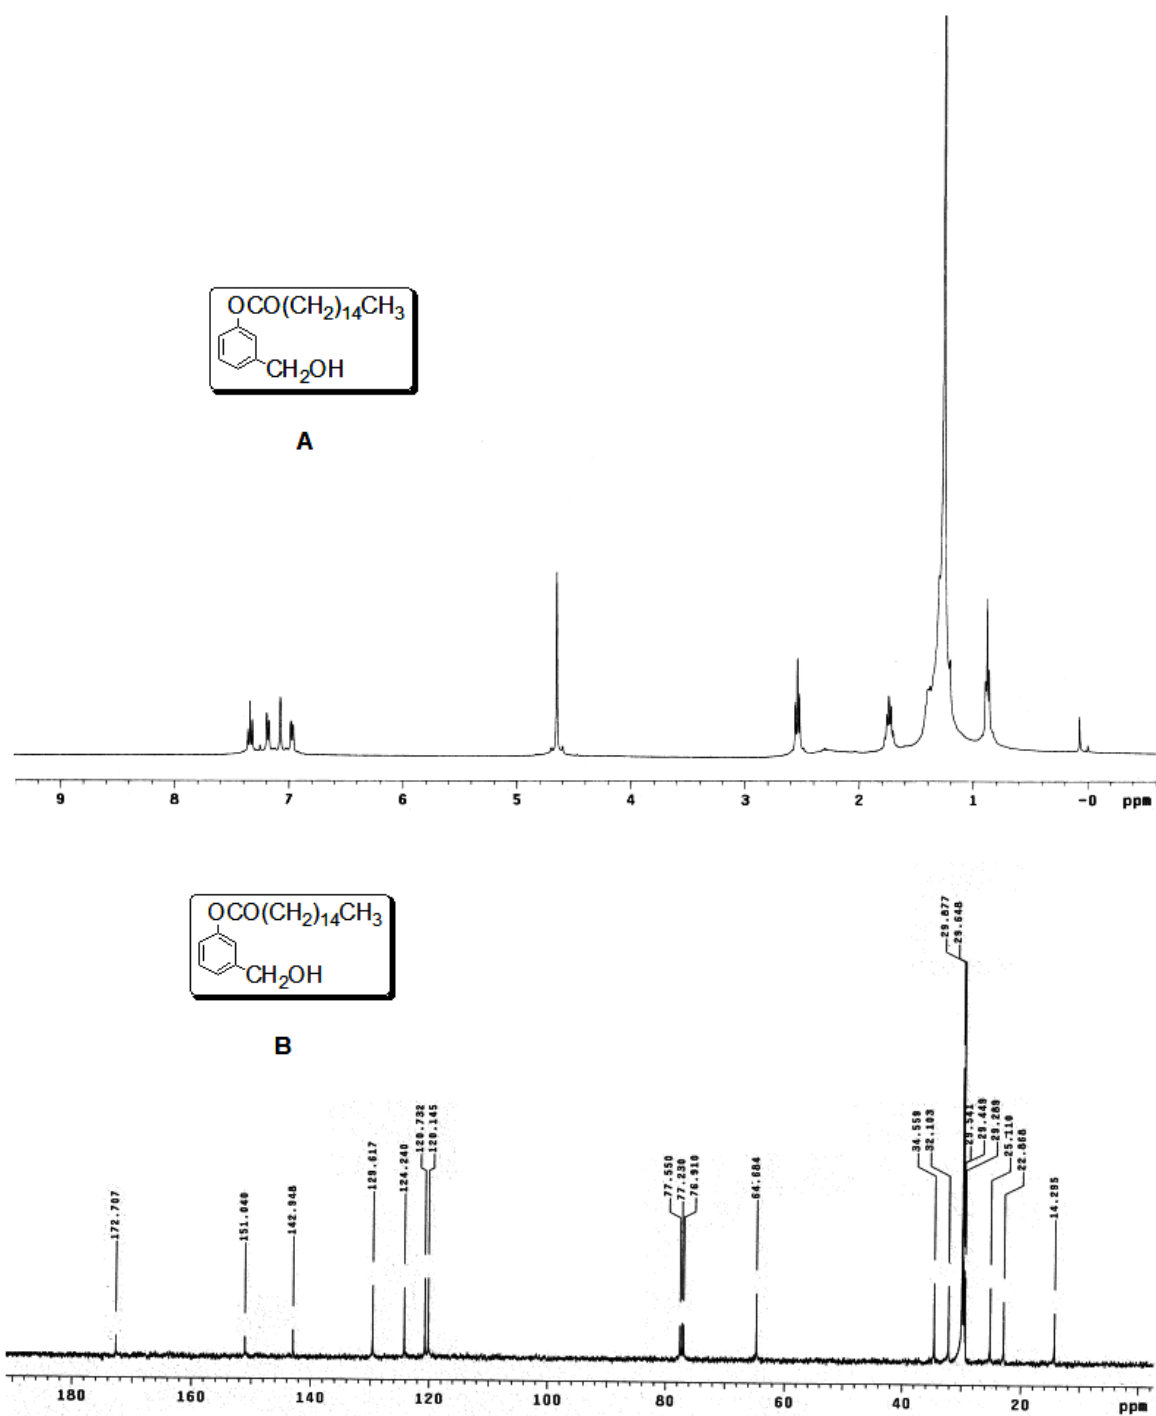

**Figure S7:**  $^1\text{H}$  NMR (**A**) and  $^{13}\text{C}$  NMR (**B**) of 3-(hydroxymethyl)phenyl palmitate (**4a**).

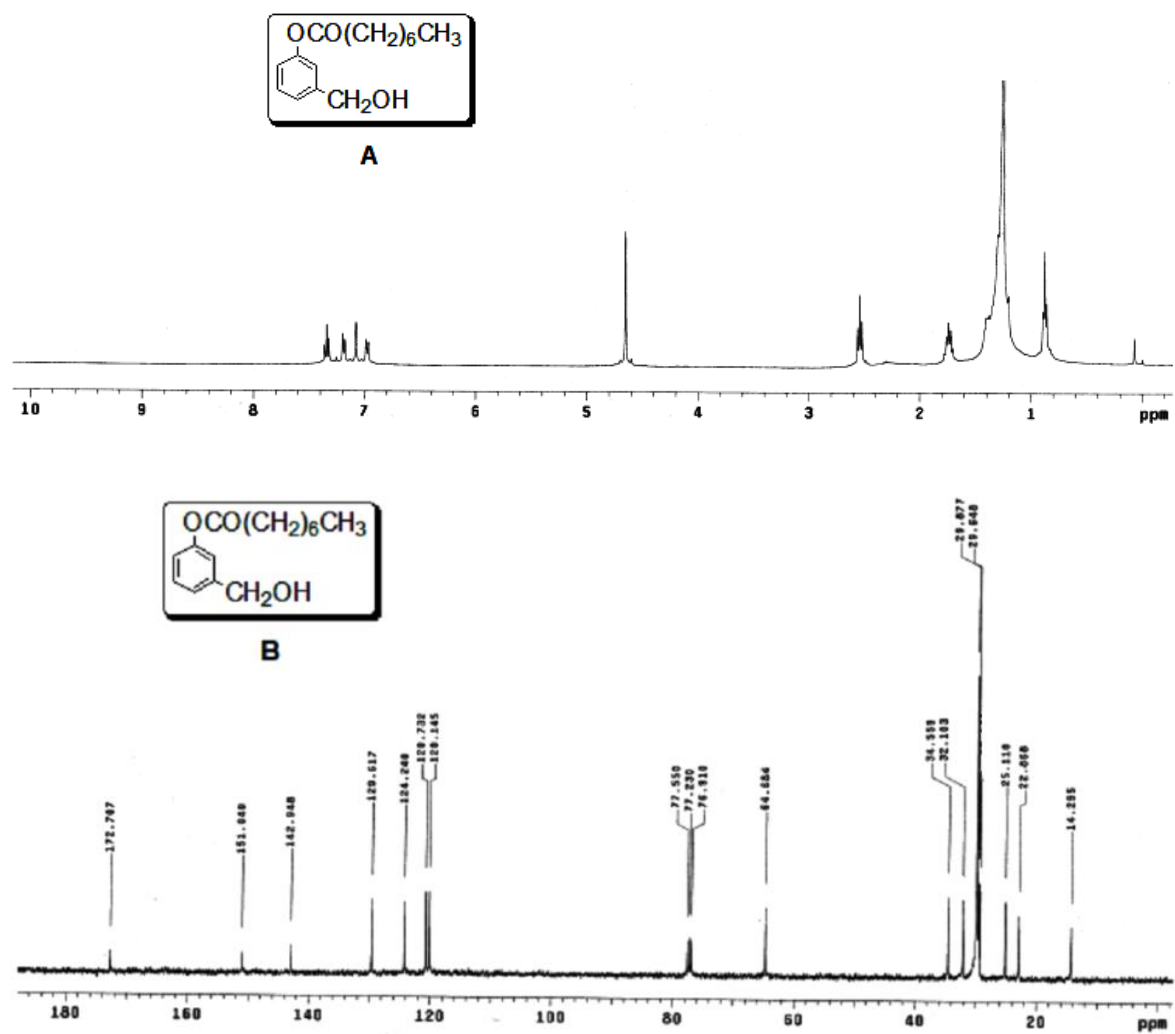

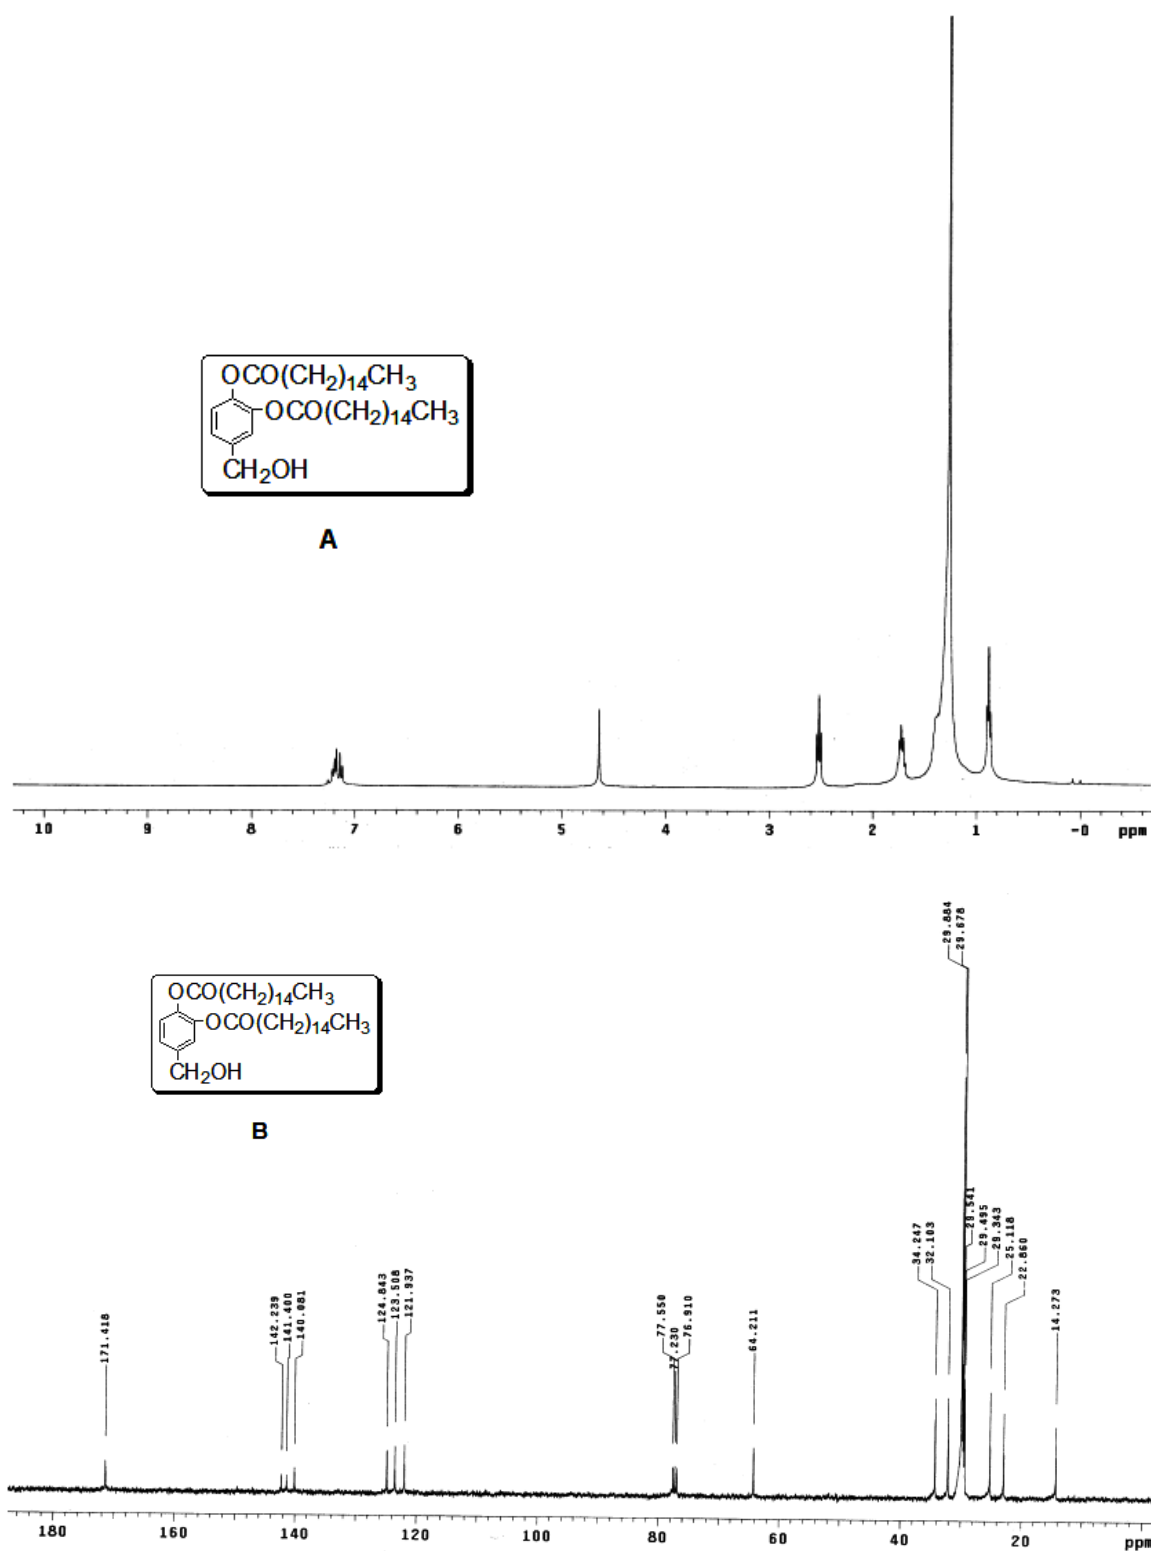

**Figure S9:** <sup>1</sup>H NMR (A) and <sup>13</sup>C NMR (B) of 4-(hydroxymethyl)-2-(hexadecanoyloxy)phenyl palmitate (**5a**).

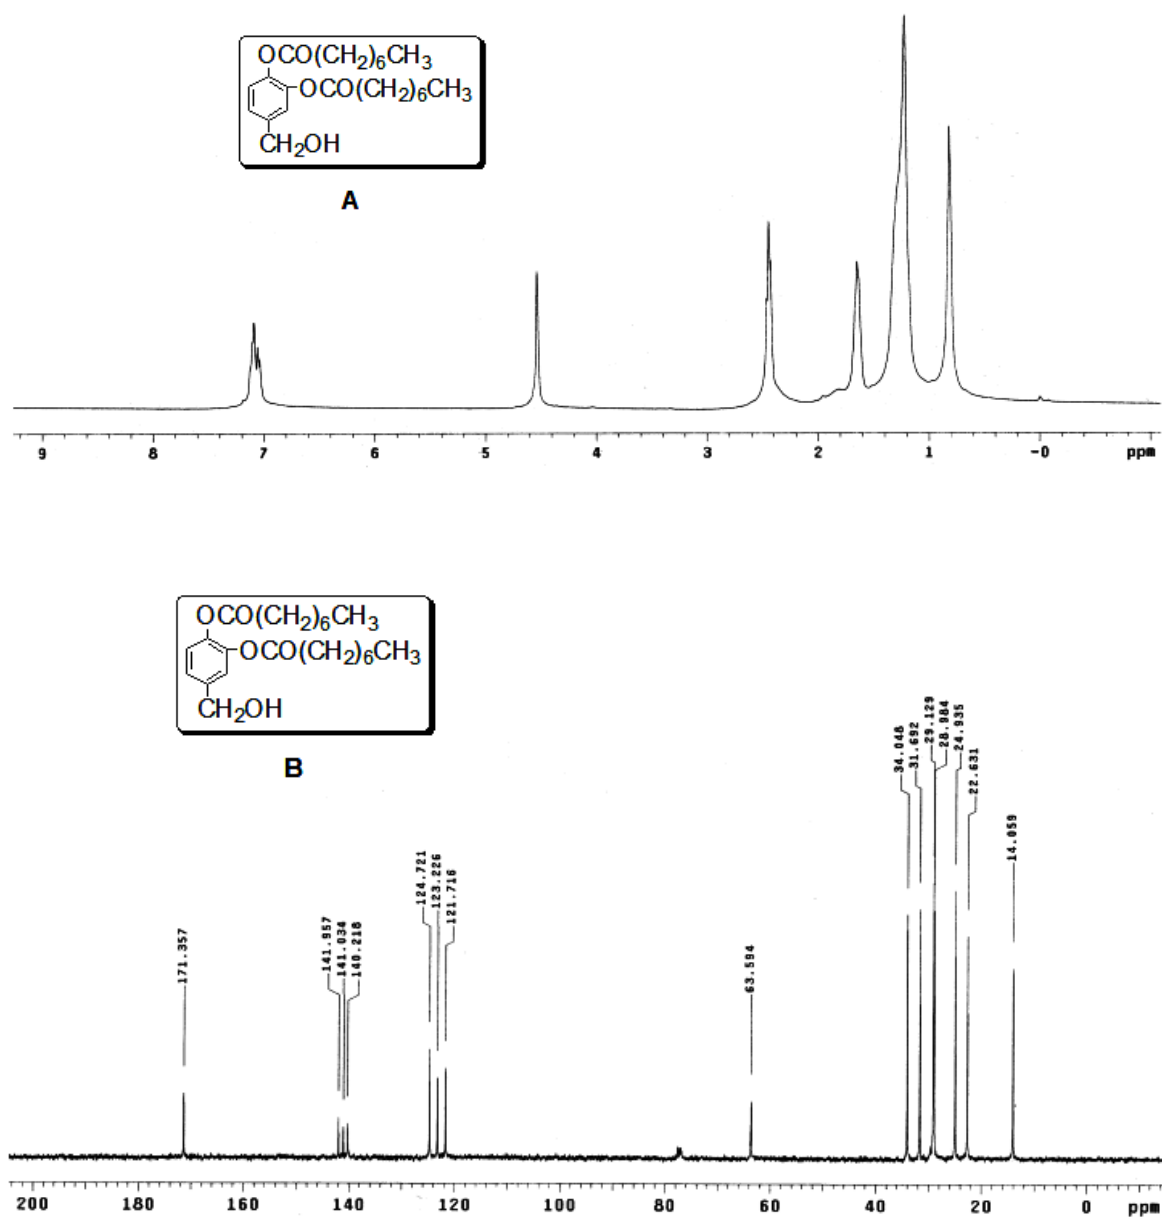

**Figure S10:** <sup>1</sup>H NMR (A) and <sup>13</sup>C NMR (B) of 4-(hydroxymethyl)-2-(octanoyloxy)phenyl octanoate (**5b**).

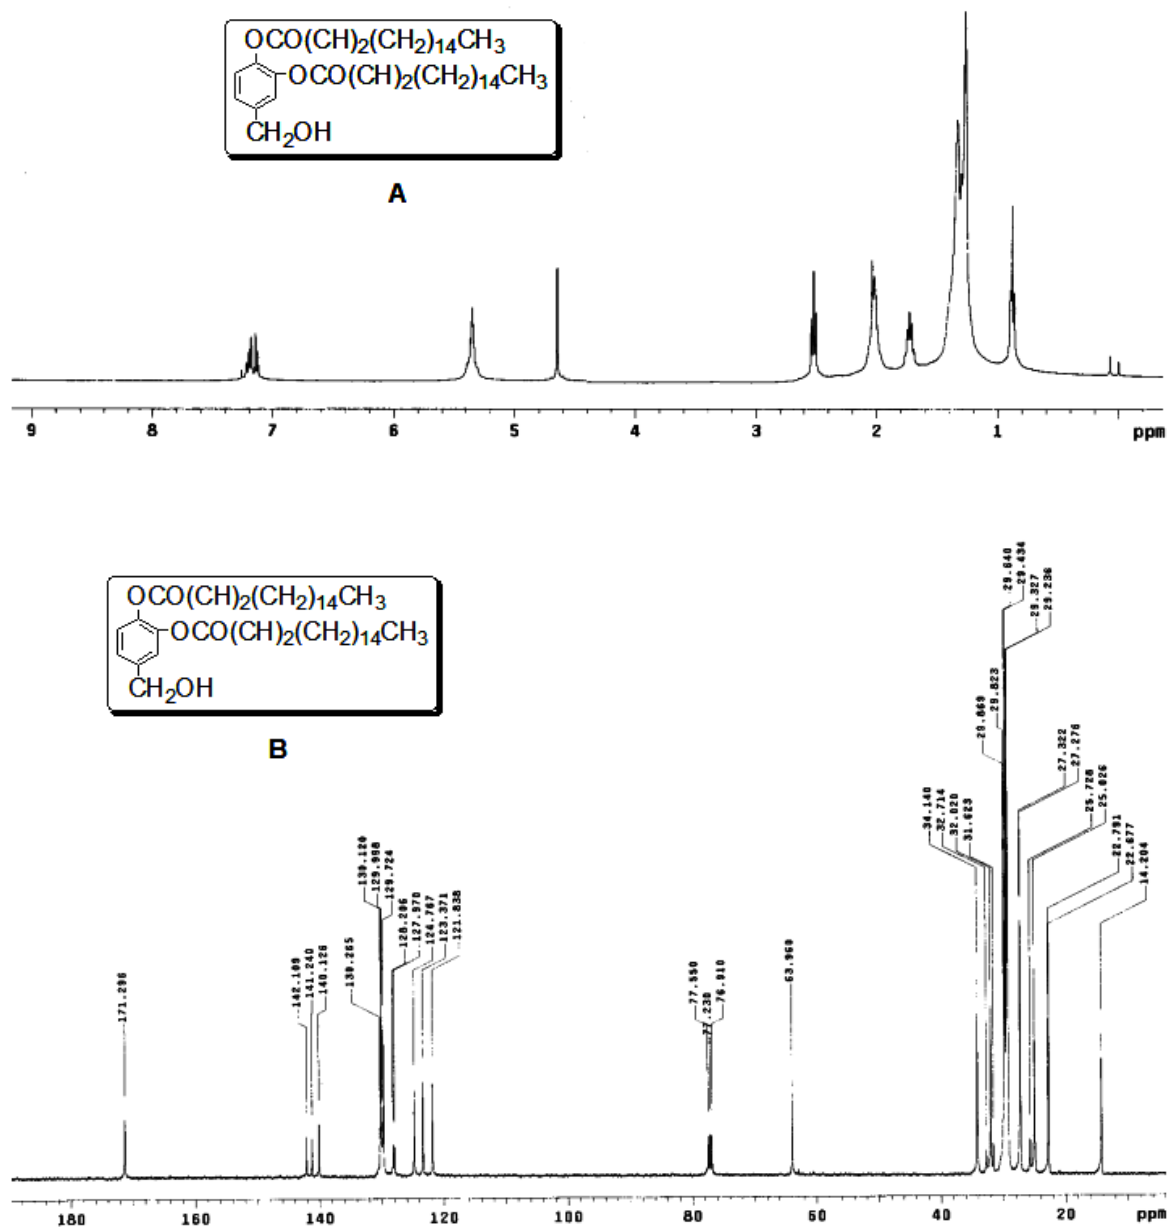

**Figure S11:** <sup>1</sup>H NMR (A) and <sup>13</sup>C NMR (B) of 2-(Z)-(octadec-9-enoyloxy)-4-(hydroxymethyl)phenyl oleate (**6**).

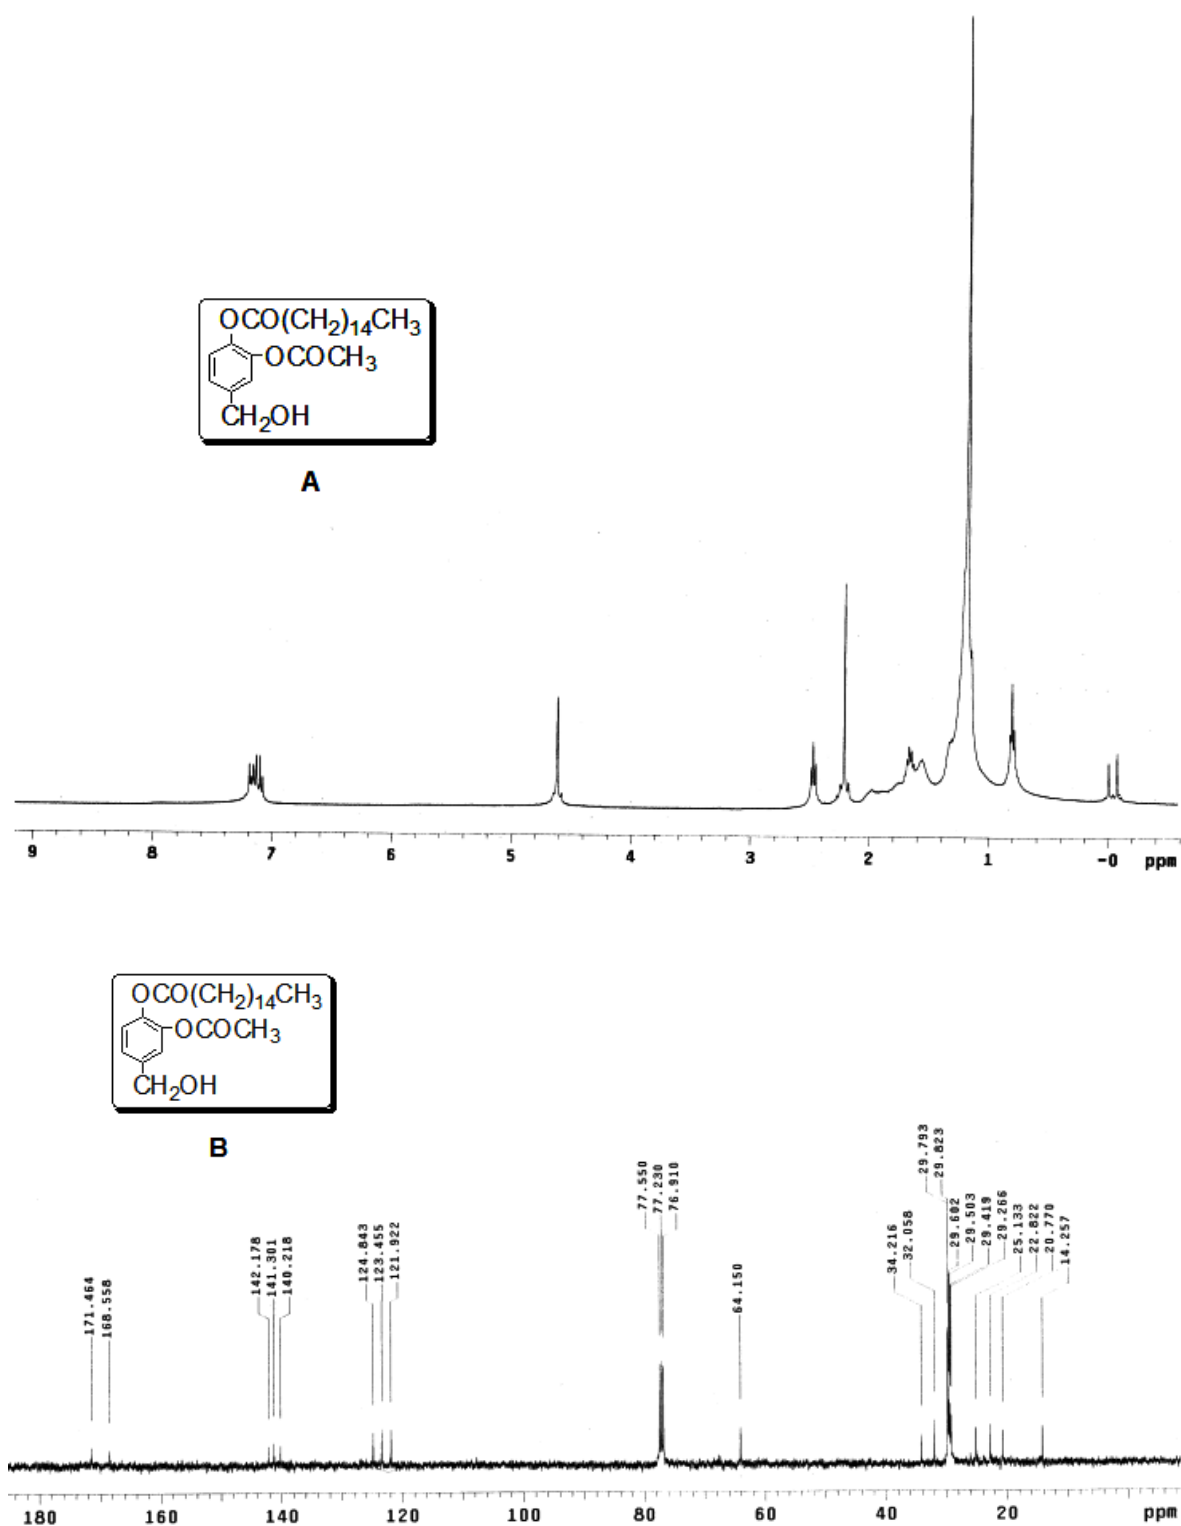

**Figure S12:**  $^1\text{H}$  NMR (A) and  $^{13}\text{C}$  NMR (B) of 2-acetoxy-4-(hydroxymethyl)phenyl palmitate (**7a**).

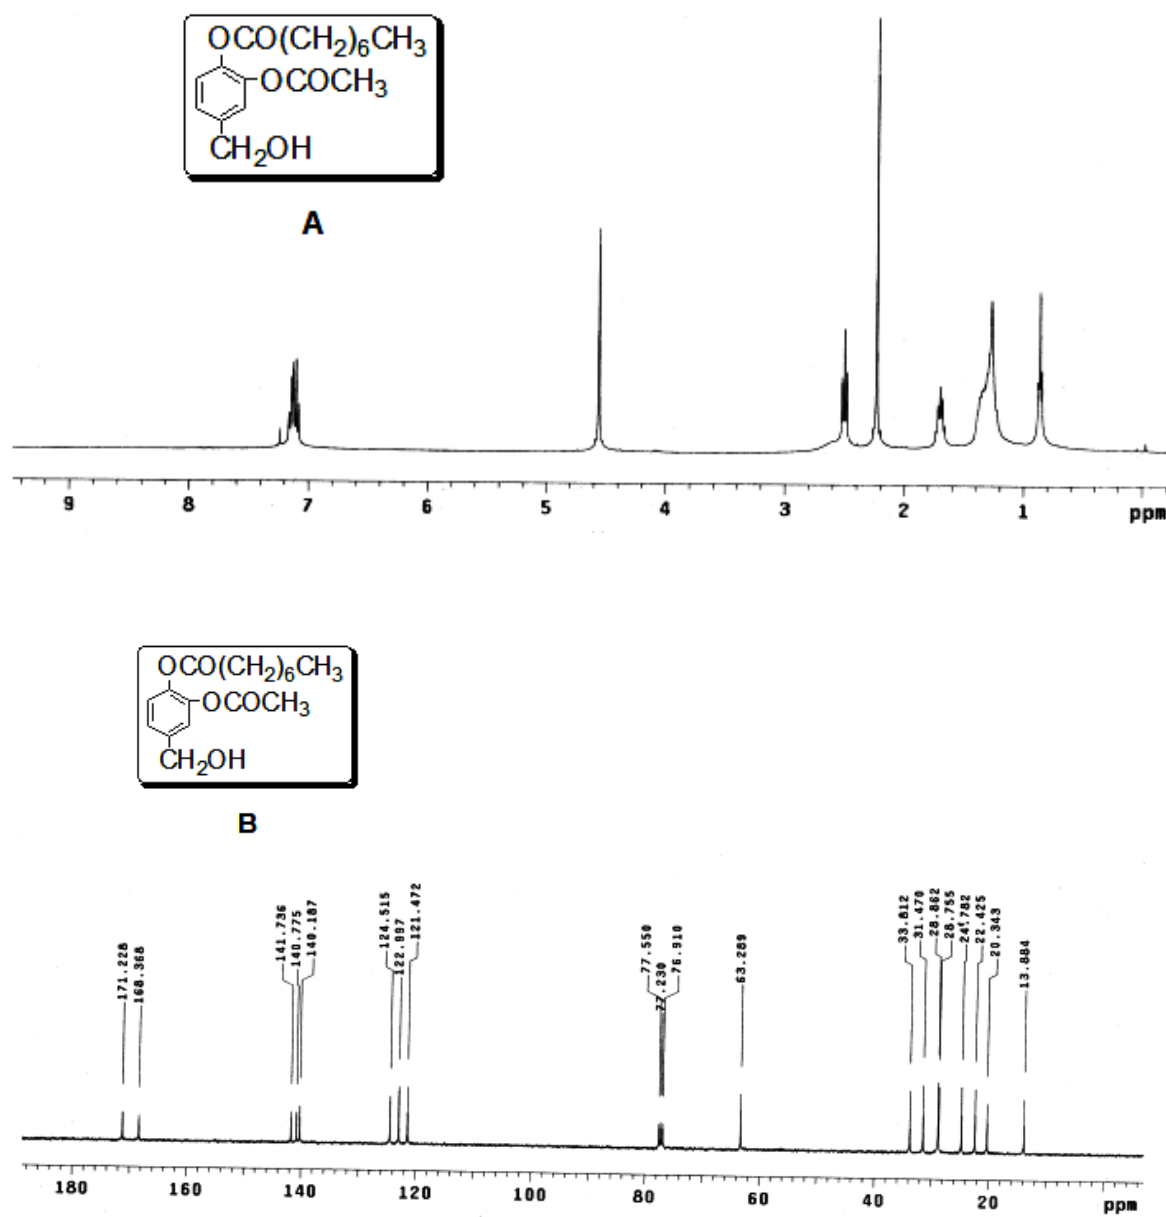

**Figure S13:** <sup>1</sup>H NMR (A) and <sup>13</sup>C NMR (B) of 2-acetoxy-4-(hydroxymethyl)phenyl octanoate (**7b**).

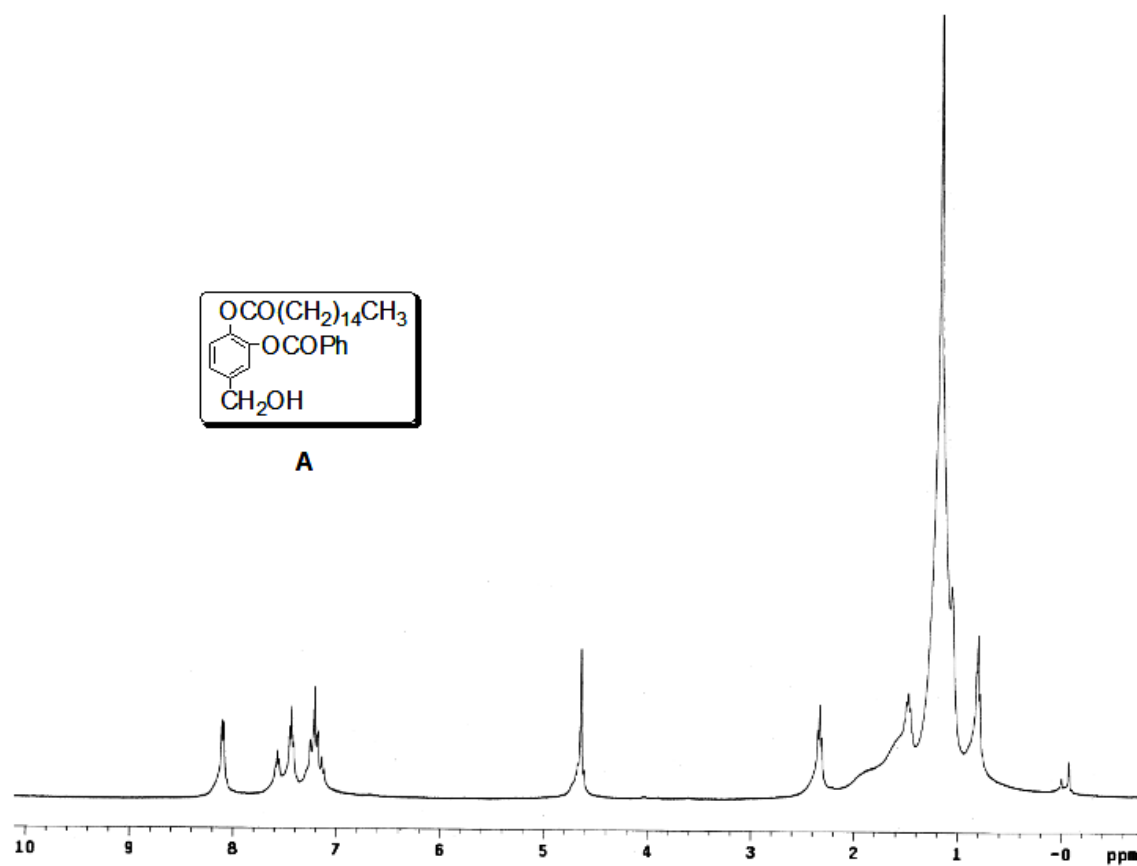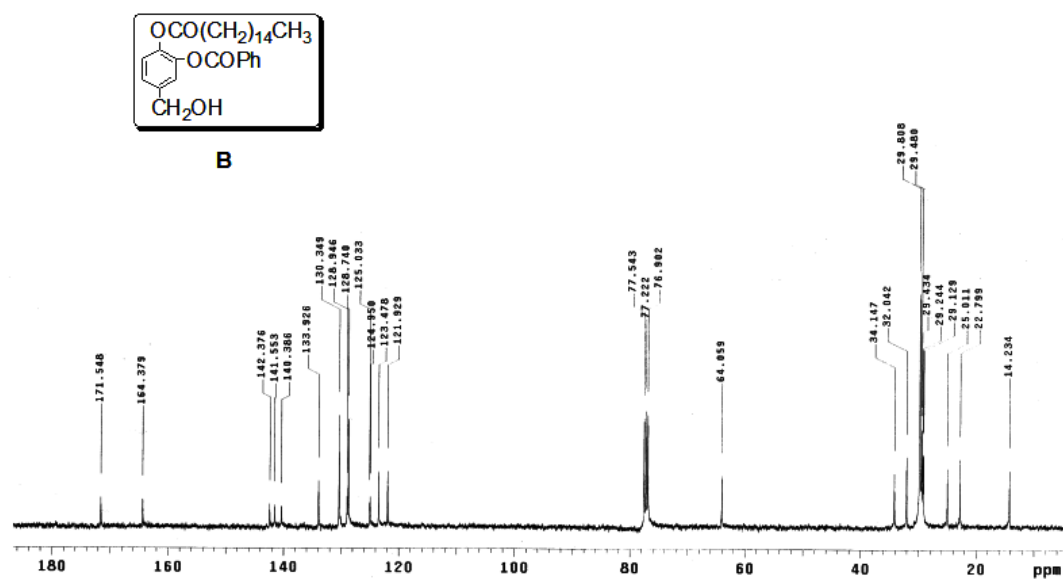

**Figure S14:**  $^1\text{H}$  NMR (**A**) and  $^{13}\text{C}$  NMR (**B**) of 5-(hydroxymethyl)-2-(palmitoyloxy)phenyl benzoate (**8a**).



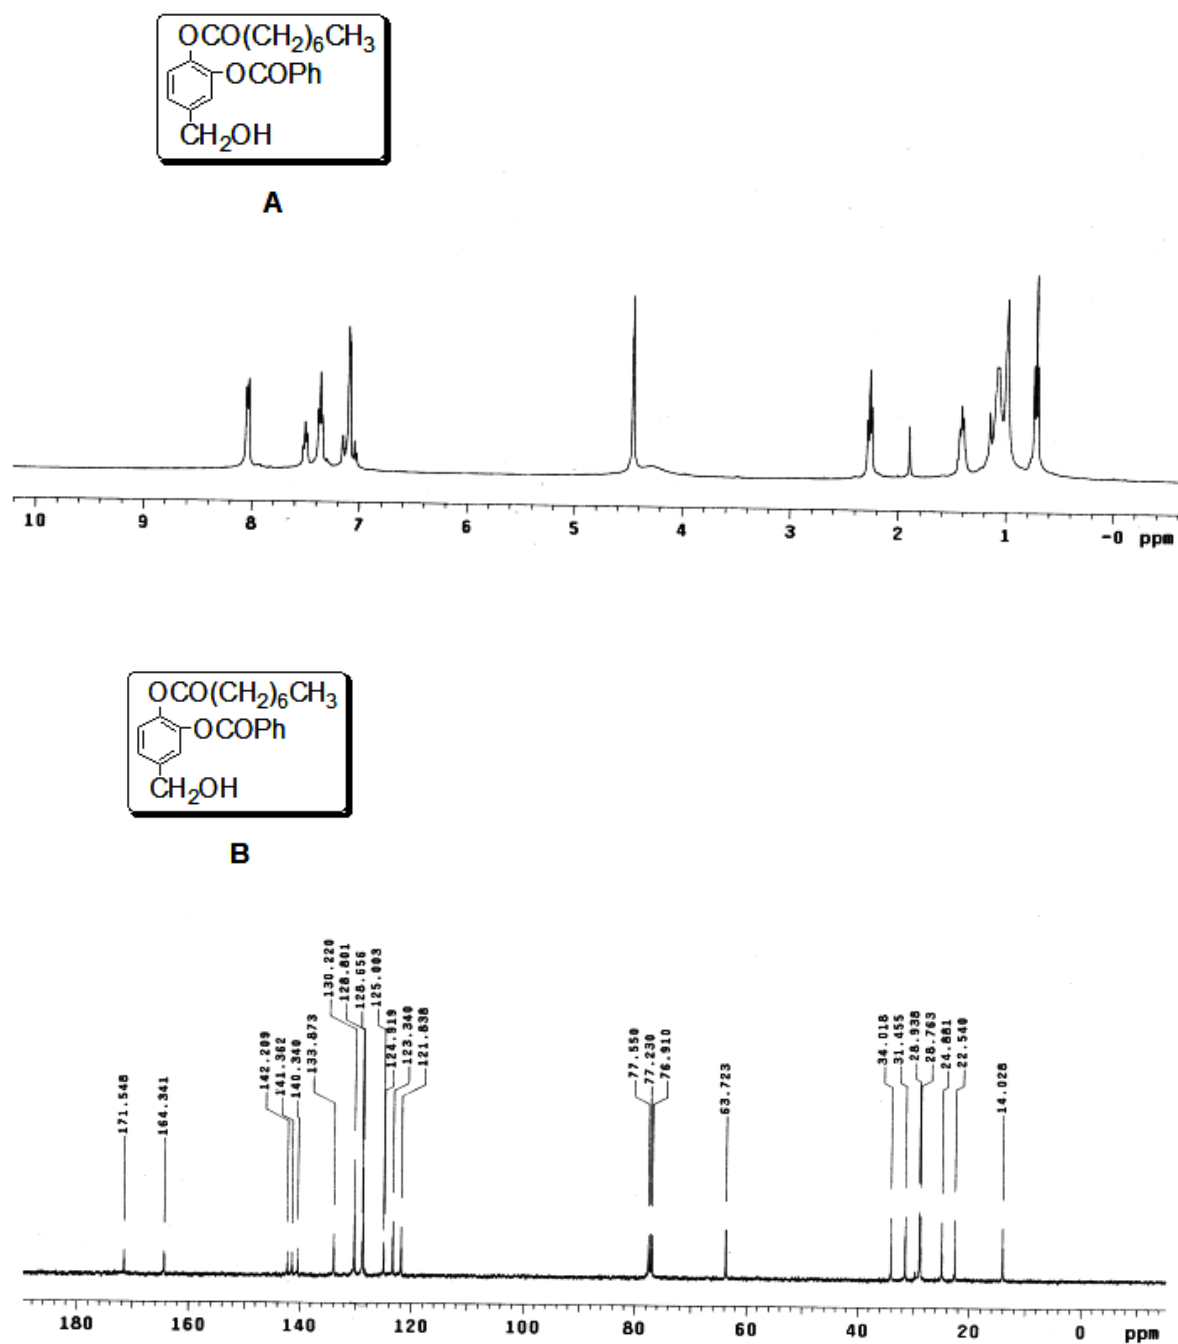

**Figure S15:** <sup>1</sup>H NMR (**A**) and <sup>13</sup>C NMR (**B**) of 5-(hydroxymethyl)-2-(octanoyloxy)phenyl benzoate (**8b**).

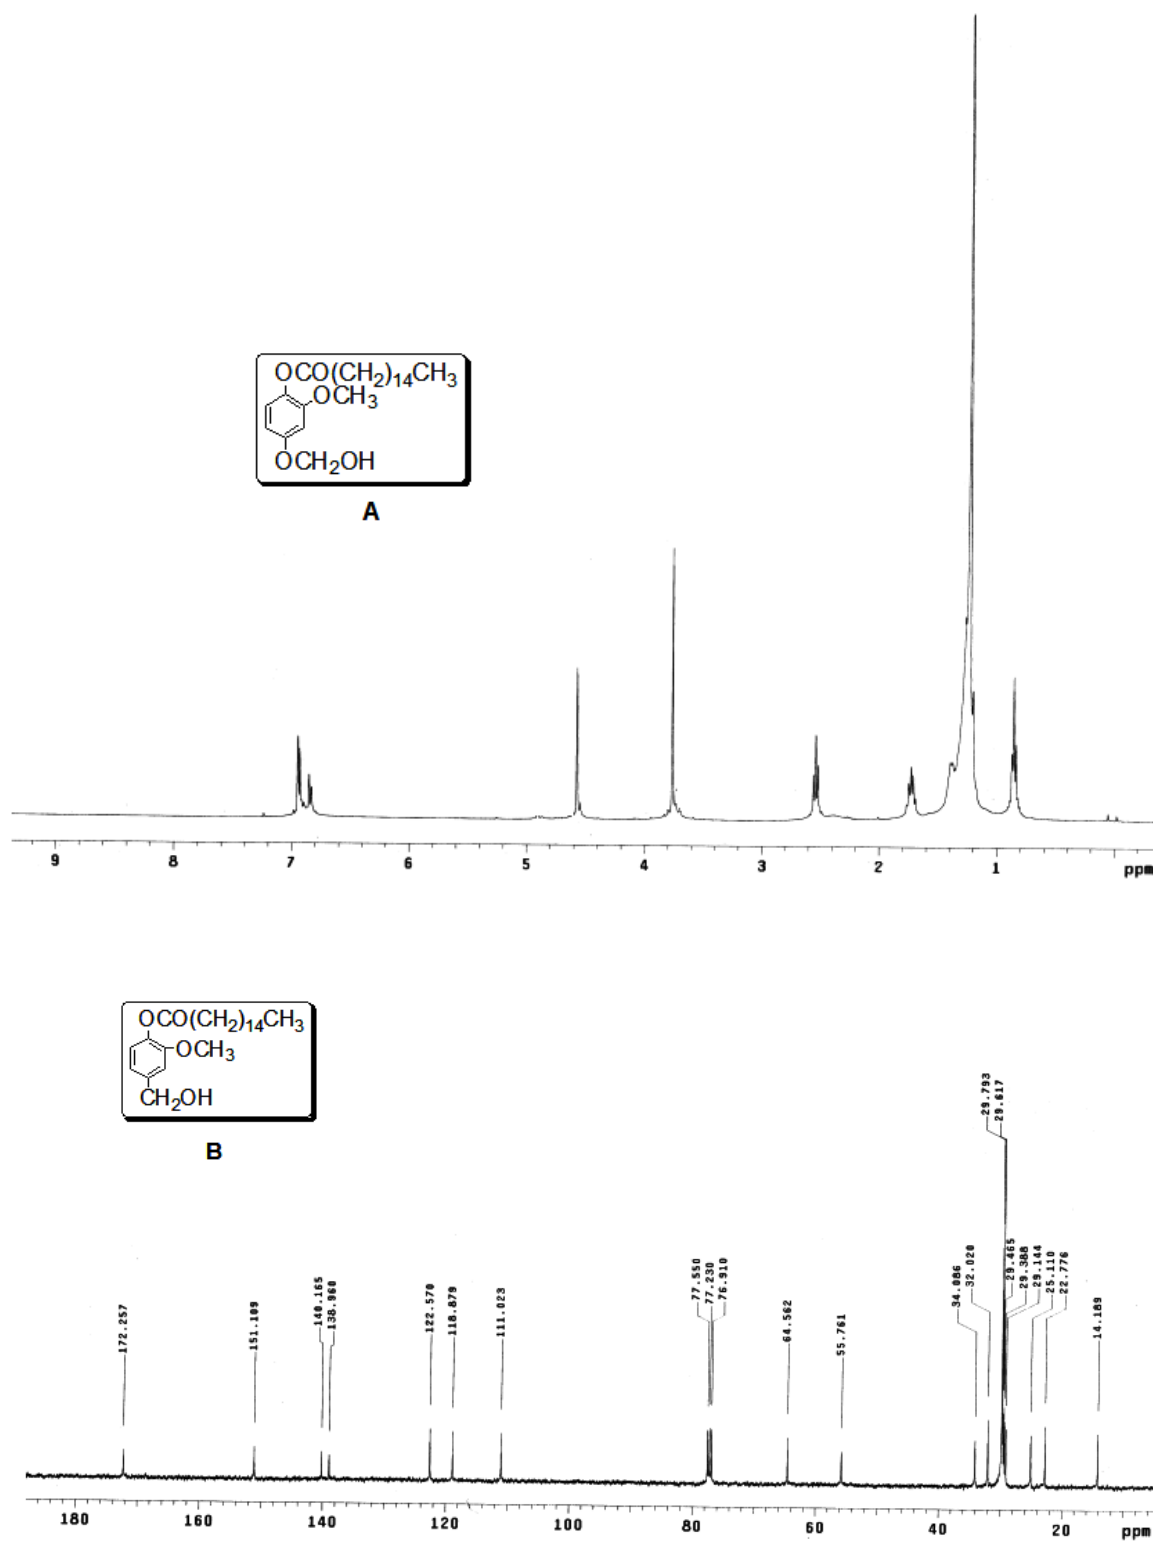

**Figure S16:**  $^1\text{H}$  NMR (A) and  $^{13}\text{C}$  NMR (B) of 4-(hydroxymethyl)-2-methoxyphenyl palmitate (**9a**).



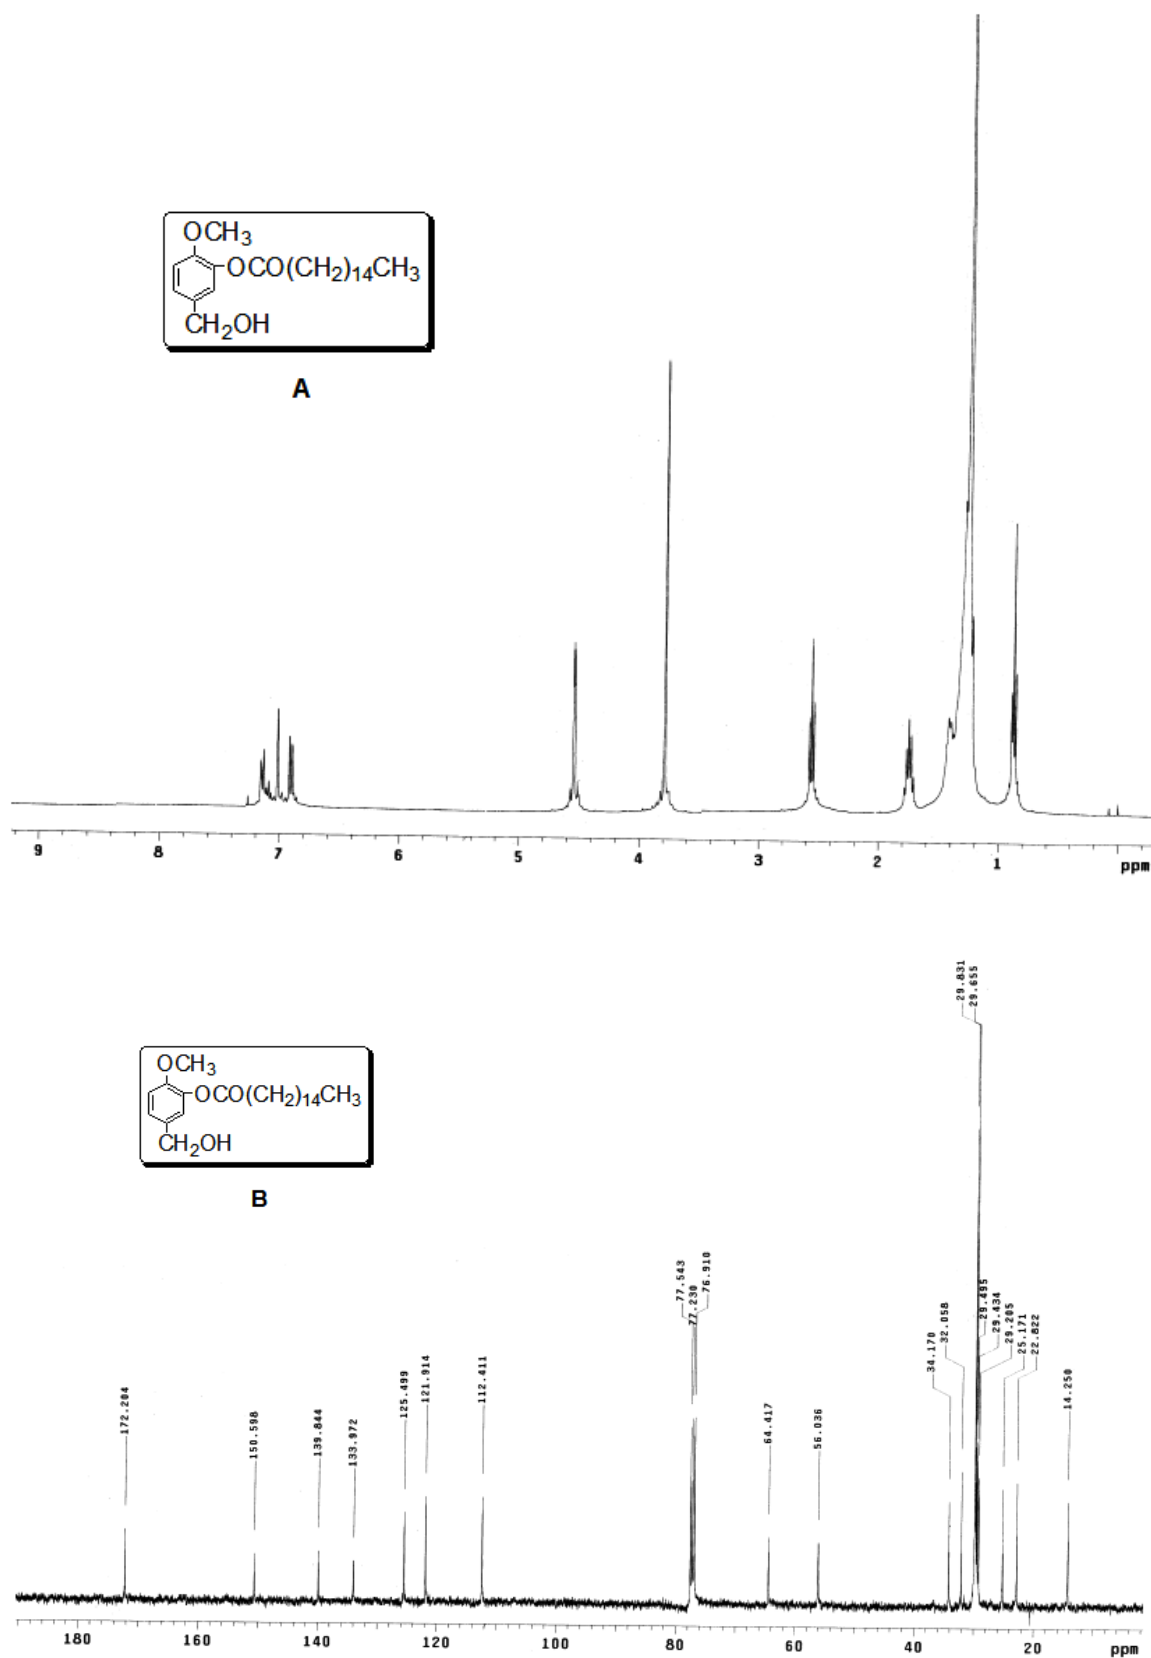

**Figure S18:** <sup>1</sup>H NMR (A) and <sup>13</sup>C NMR (B) of 5-(hydroxymethyl)-2-methoxyphenyl palmitate (**10a**).

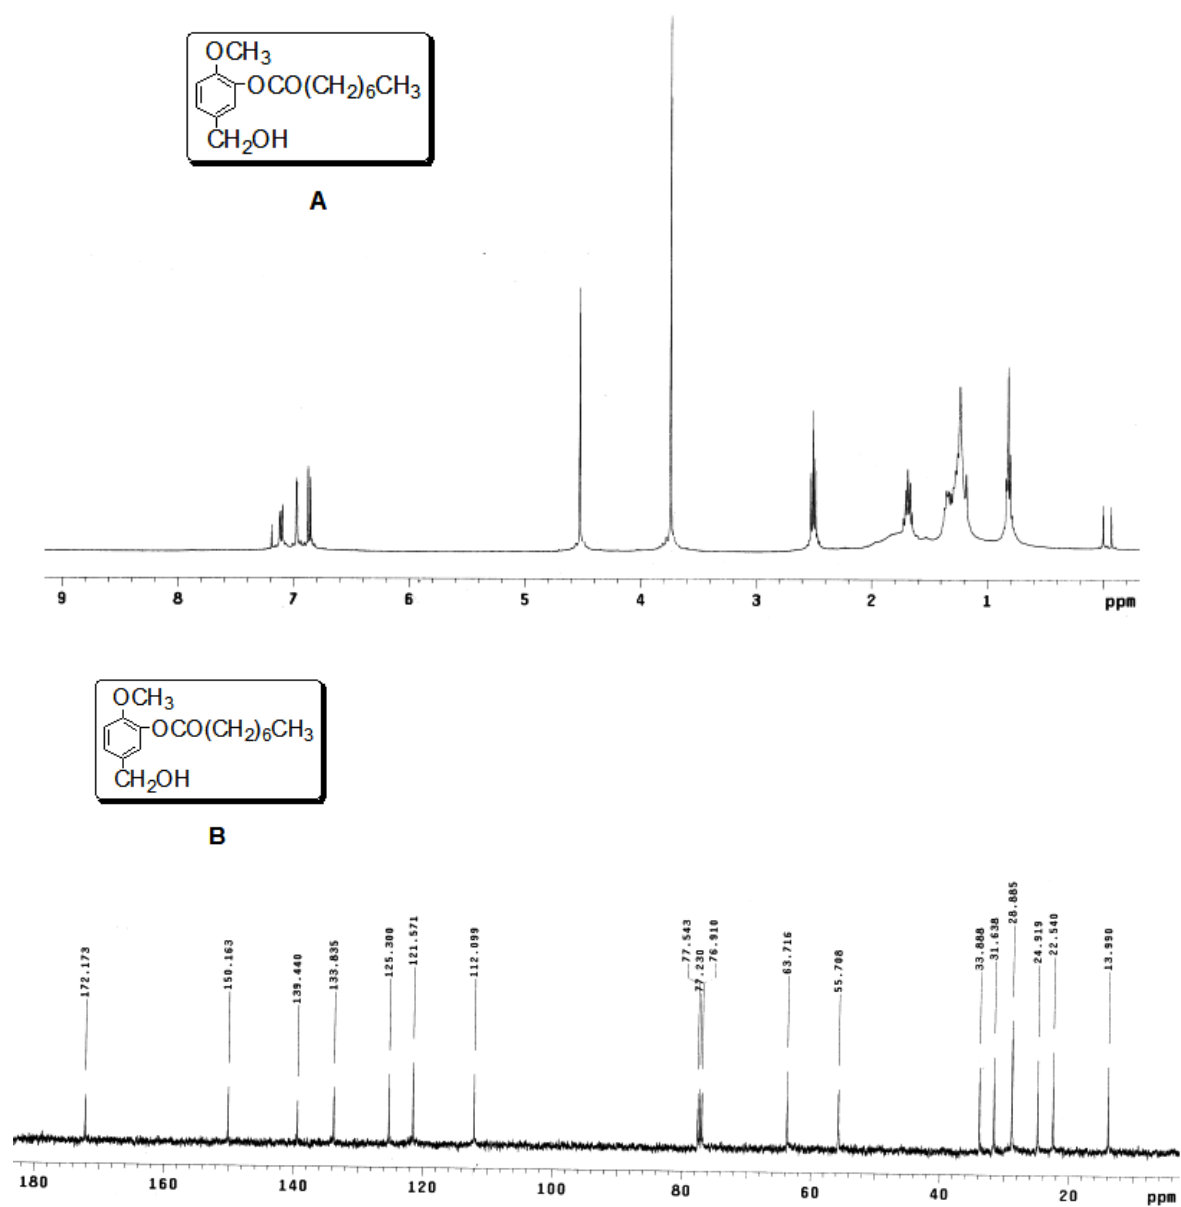

**Figure S19:**  $^1\text{H}$  NMR (**A**) and  $^{13}\text{C}$  NMR (**B**) of 5-(hydroxymethyl)-2-methoxyphenyl octanoate (**10b**).

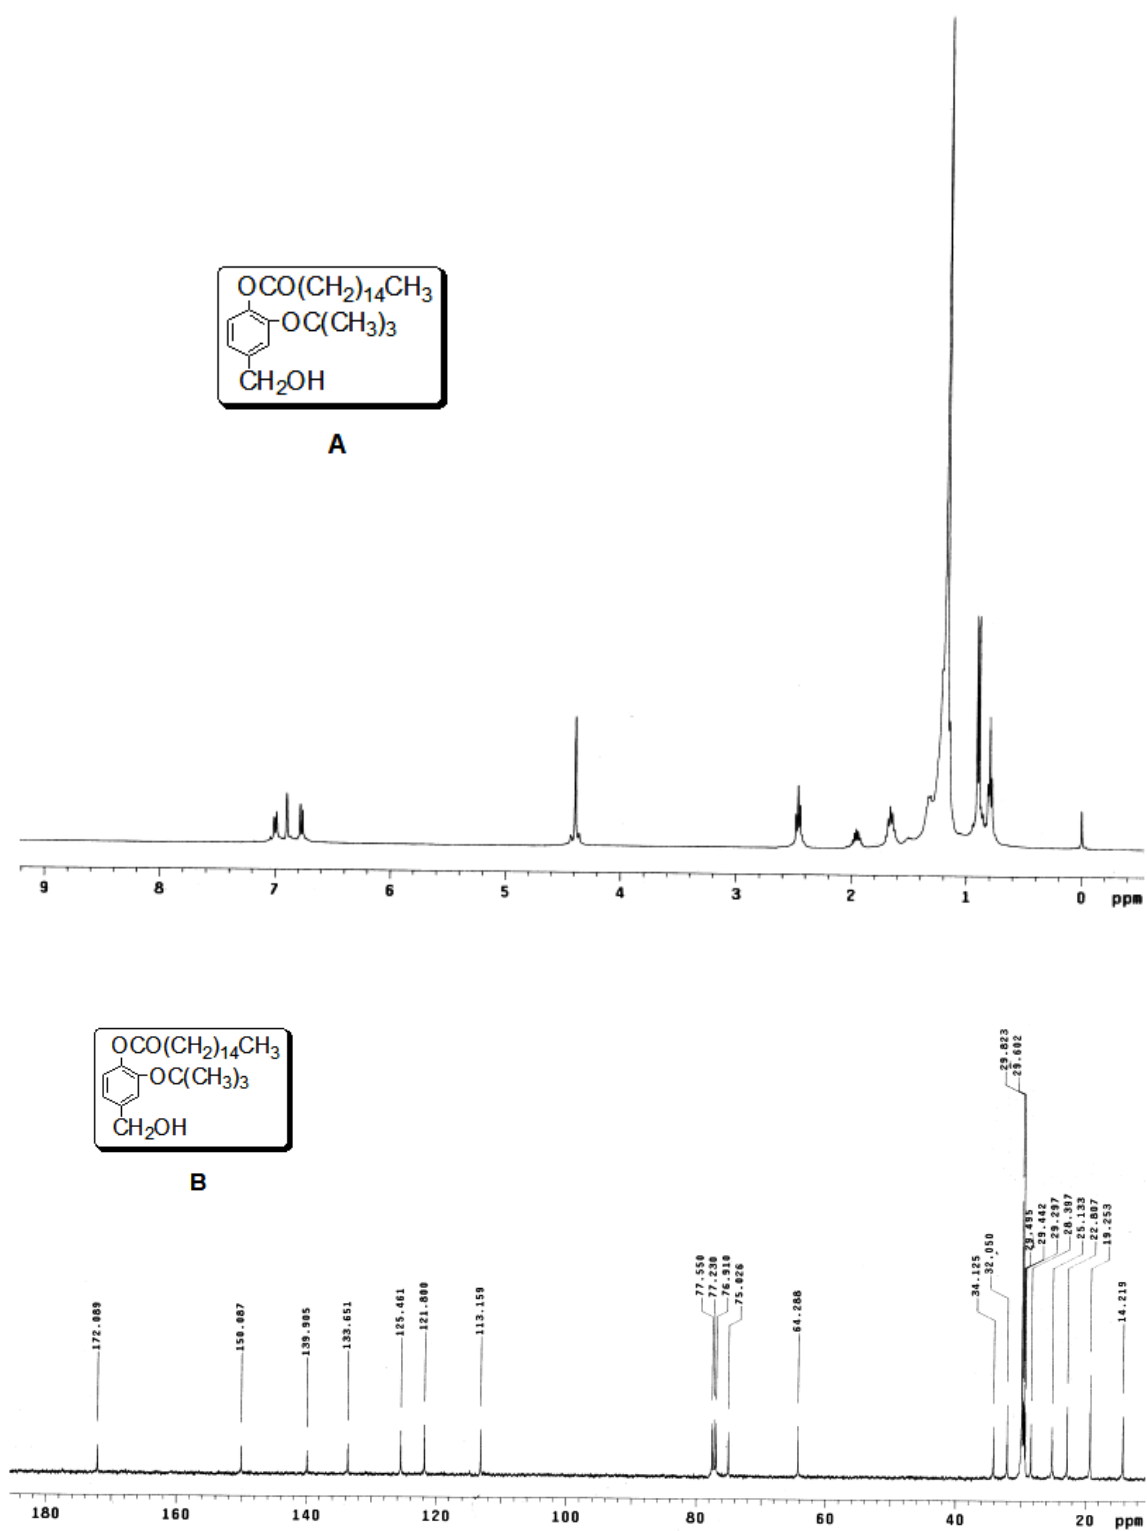

**Figure S20:**  $^1\text{H}$  NMR (**A**) and  $^{13}\text{C}$  NMR (**B**) of 2-tert-butoxy-4-(hydroxymethyl)phenyl palmitate (**11a**).

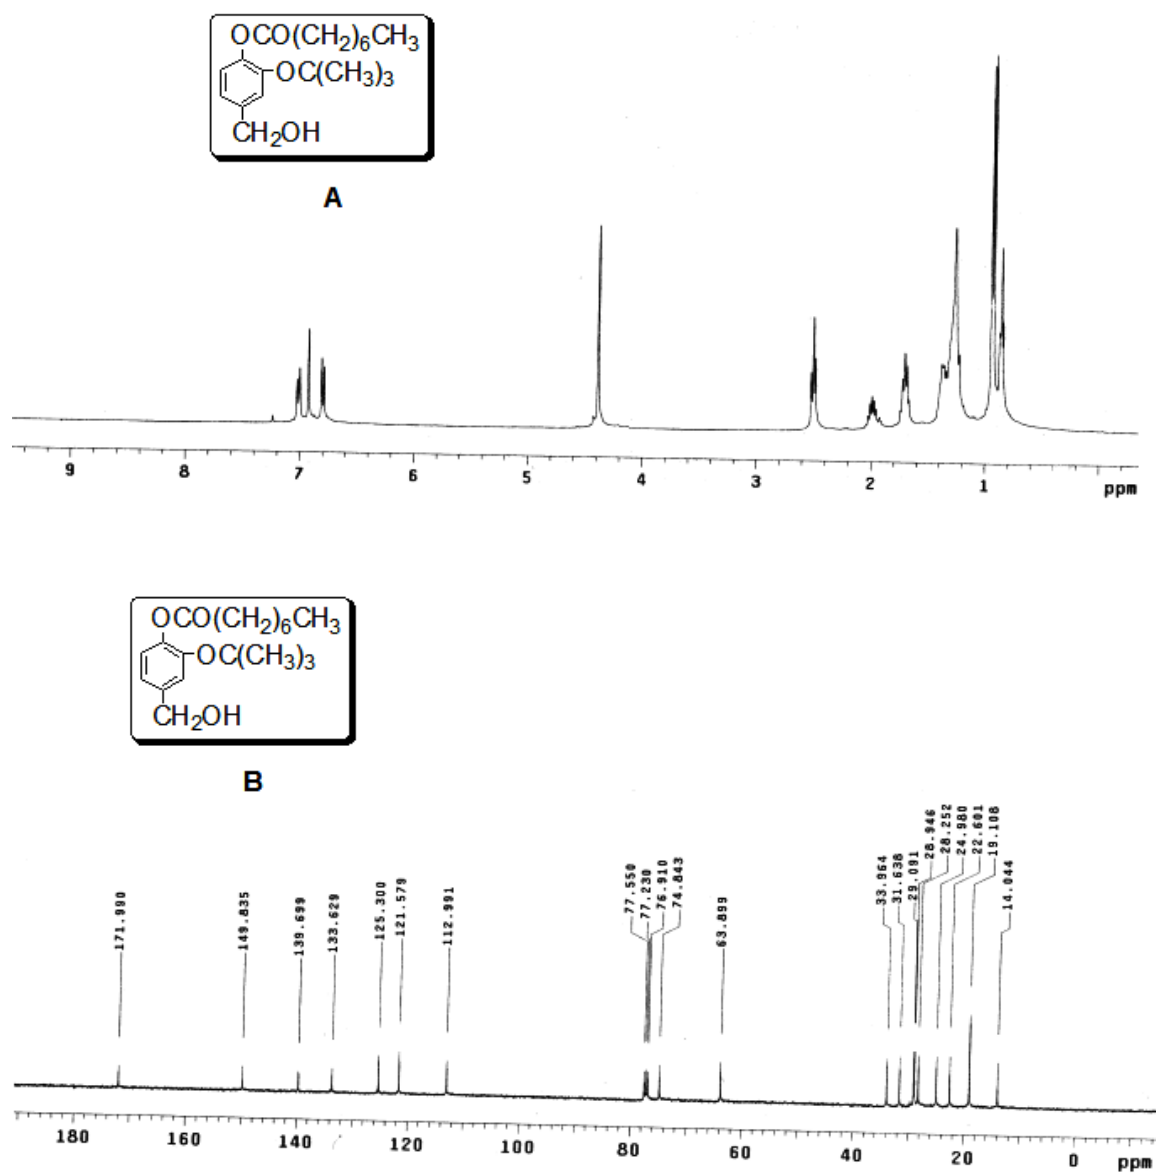

**Figure S21:**  $^1\text{H}$  NMR (**A**) and  $^{13}\text{C}$  NMR (**B**) of 2-tert-butoxy-4-(hydroxymethyl)phenyl octanoate (**11b**).

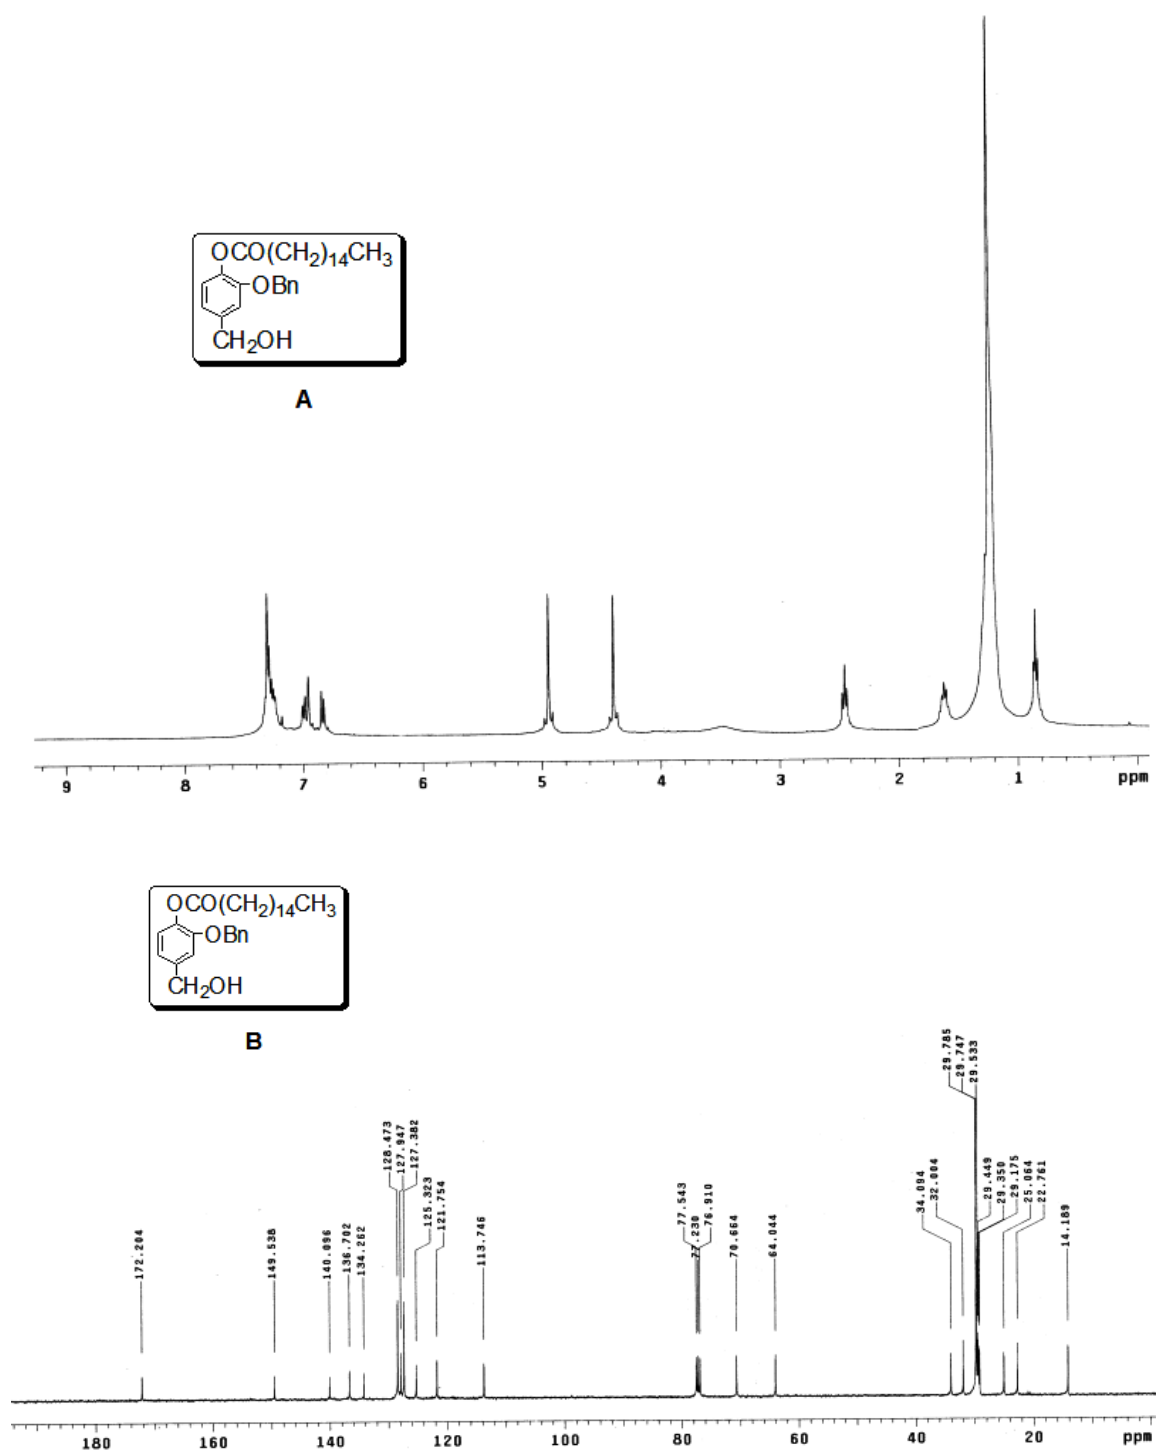

**Figure S22:**  $^1\text{H}$  NMR (**A**) and  $^{13}\text{C}$  NMR (**B**) of 2-(benzyloxy)-4-(hydroxymethyl)phenyl palmitate (**12a**).



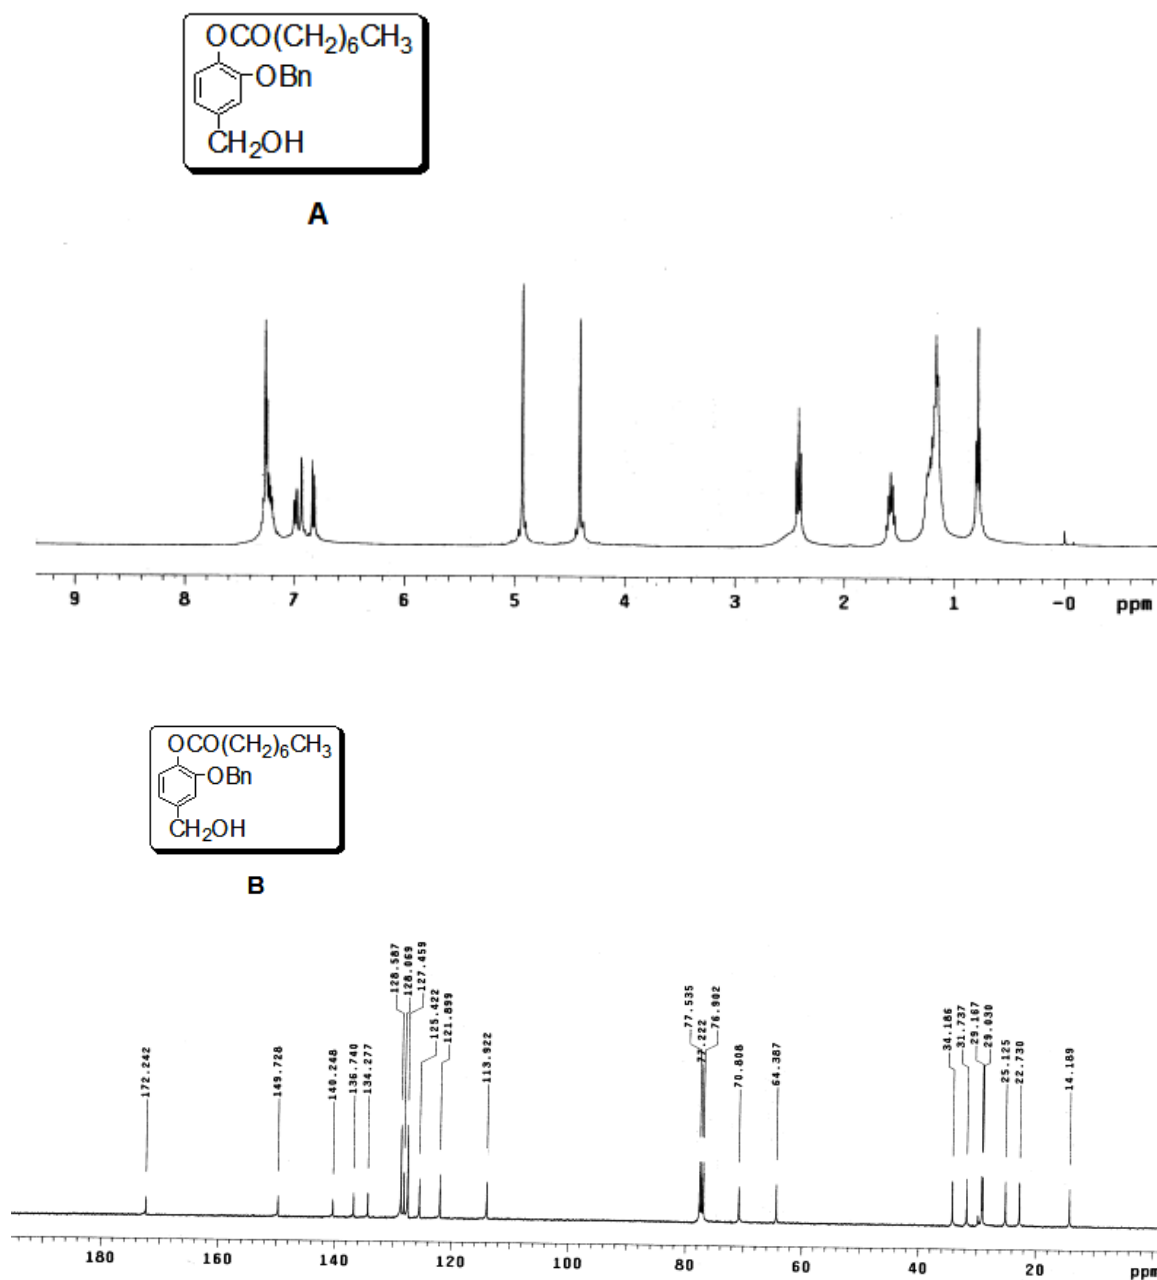

**Figure S23:** <sup>1</sup>H NMR (A) and <sup>13</sup>C NMR (B) of 2-(benzyloxy)-4-(hydroxymethyl)phenyl octanoate (**12b**).

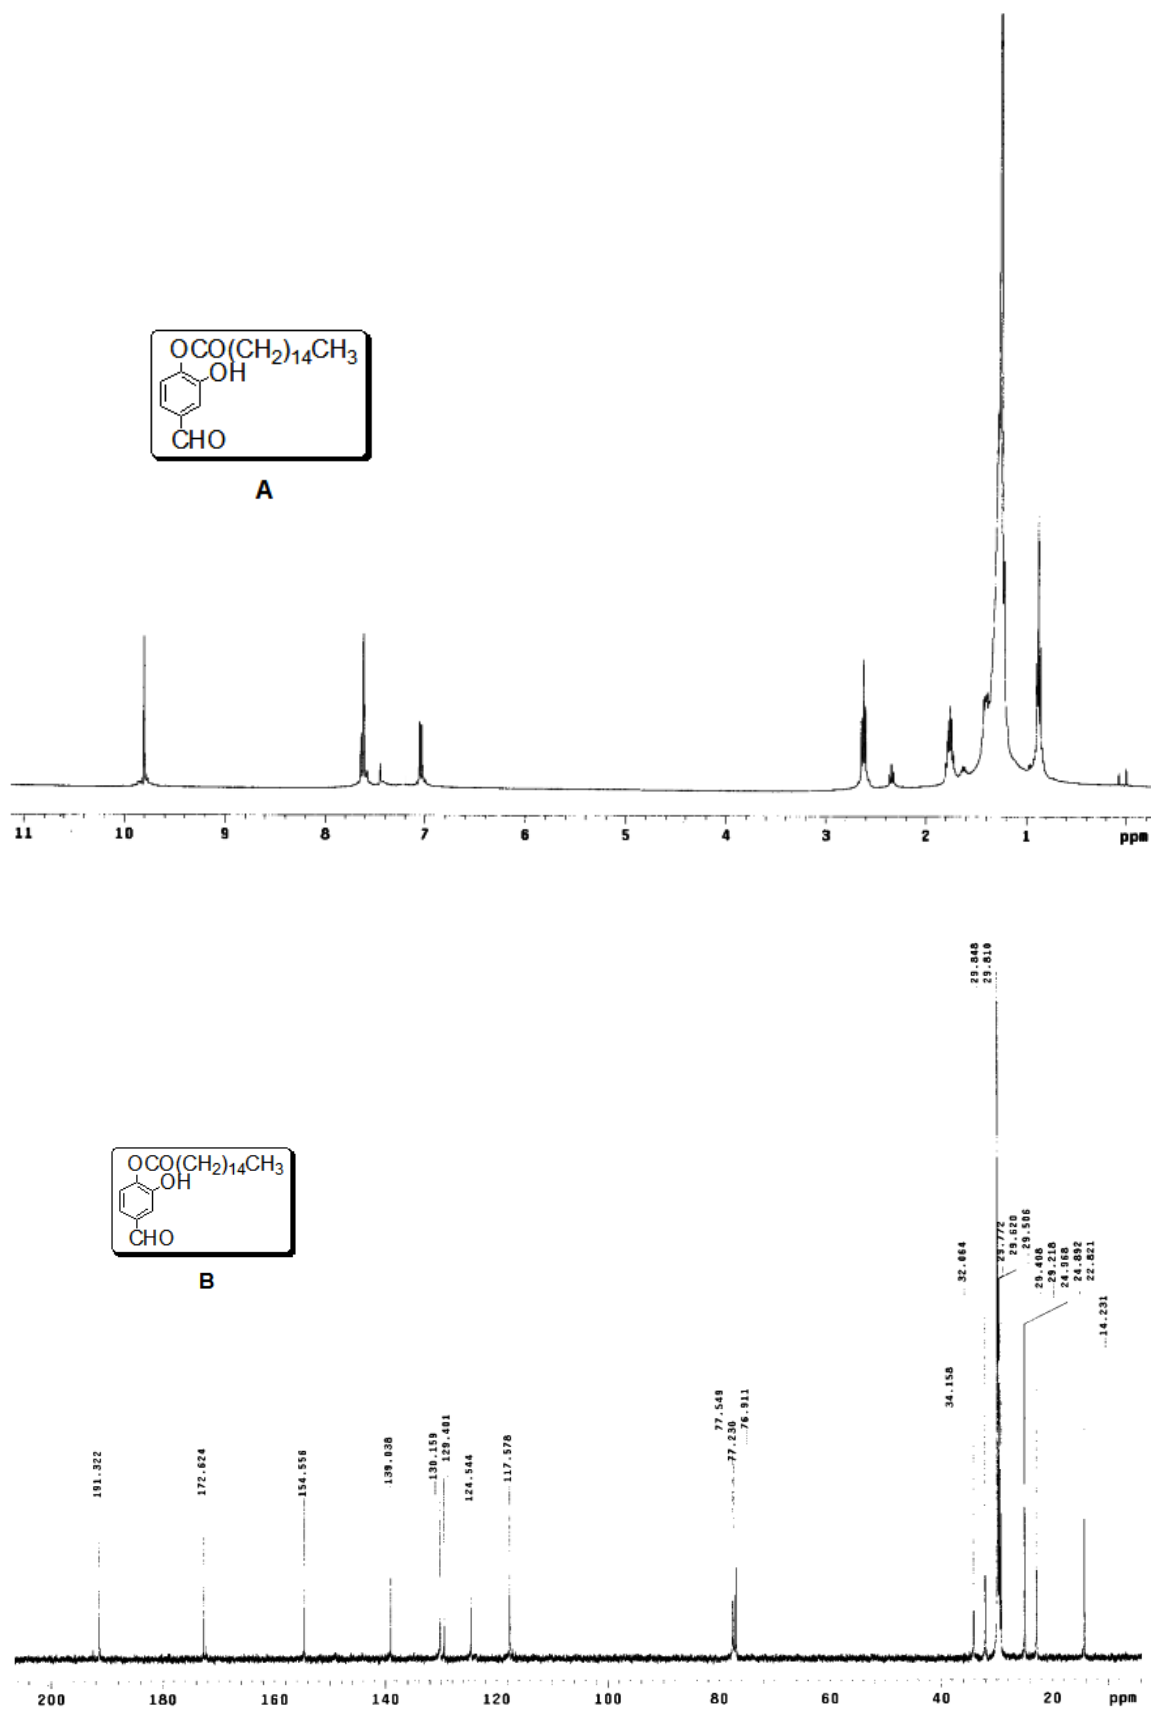

**Figure S24:**  $^1\text{H}$  NMR (A) and  $^{13}\text{C}$  NMR (B) of 4-formyl-2-hydroxyphenyl palmitate.

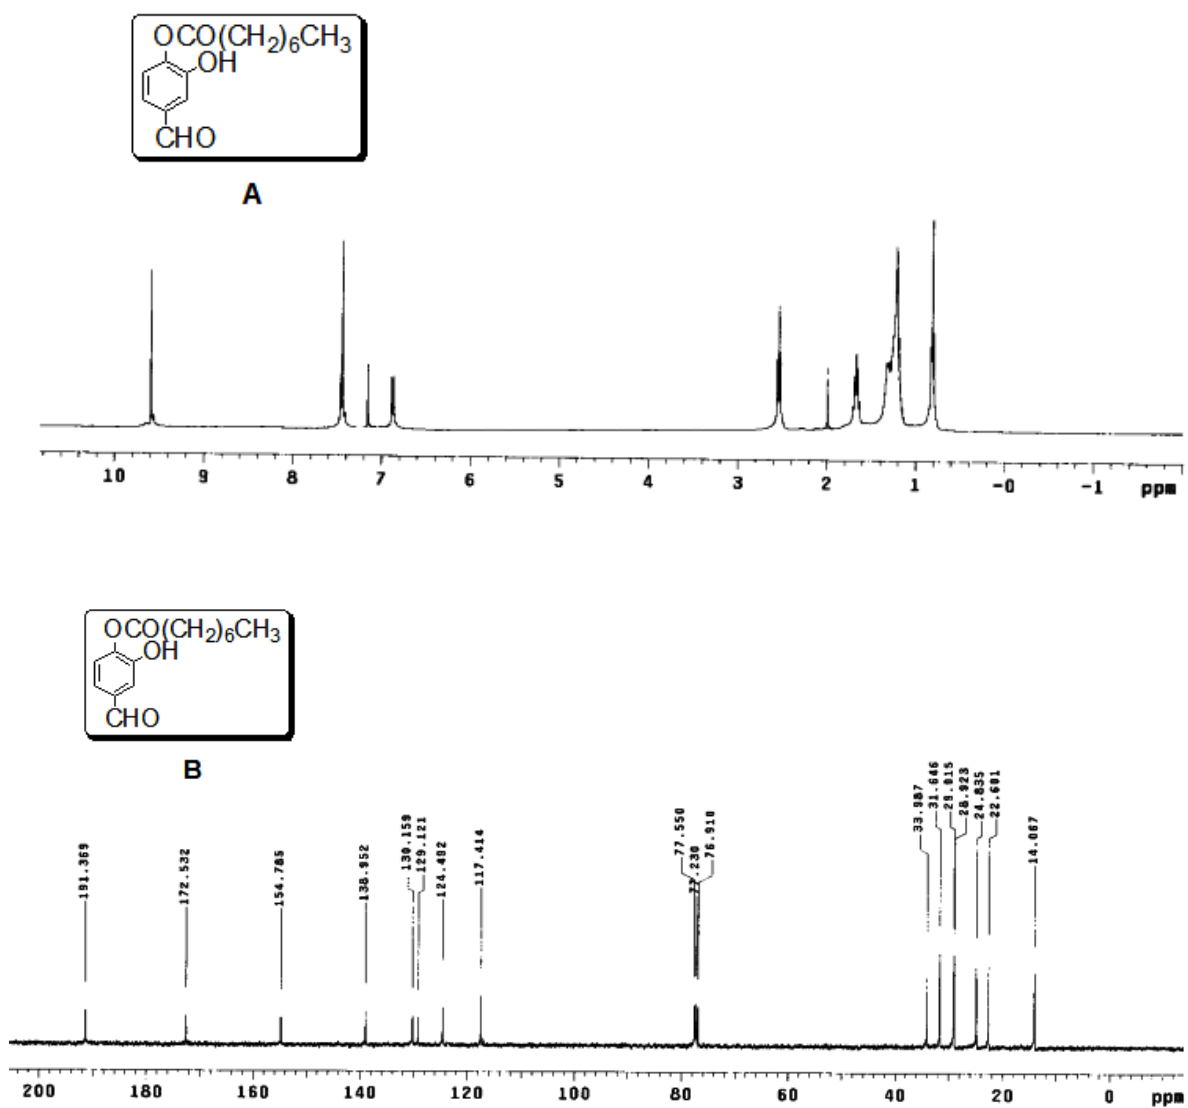

**Figure S25:** <sup>1</sup>H NMR (A) and <sup>13</sup>C NMR (B) of 4-formyl-2-hydroxyphenyl octanoate.

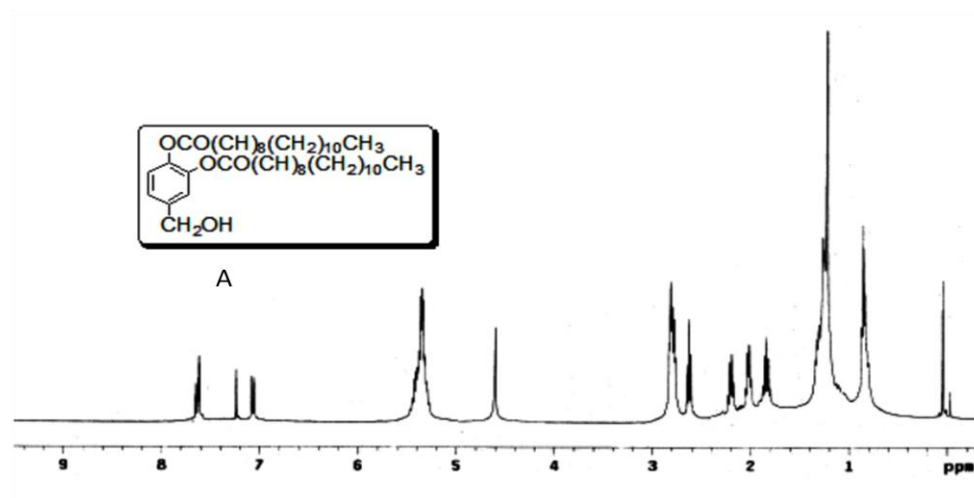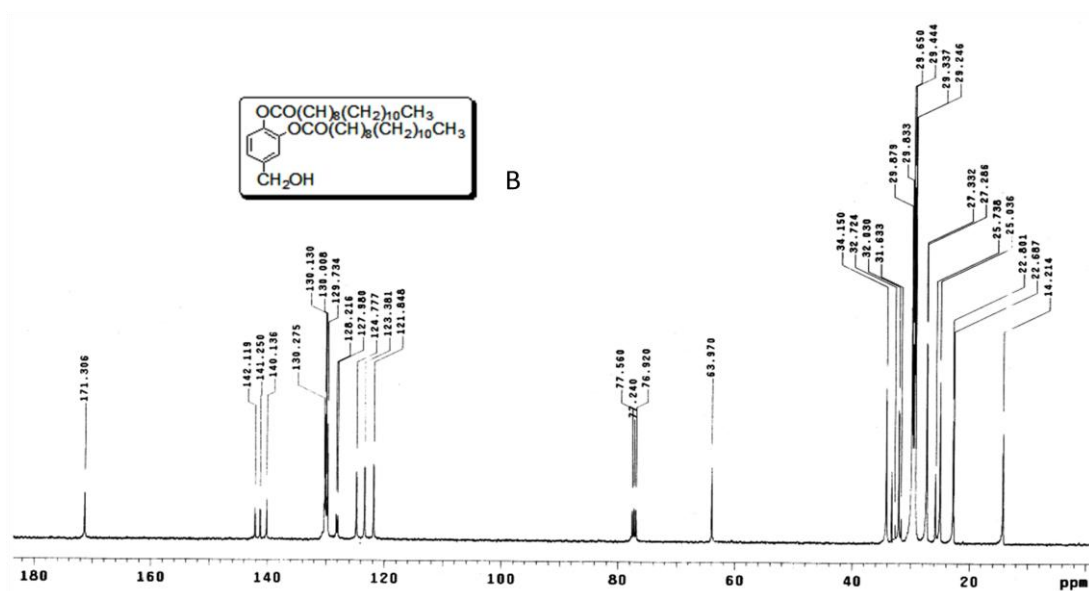

**Figure S26:**  $^1\text{H}$ NMR (A) &  $^{13}\text{C}$  NMR (B) of 4-(hydroxymethyl)-2-[(5Z,8Z,11Z,14Z)-icosa-5,8,11,14-tetraenoyloxy]phenyl(5Z,8Z,11Z,14Z)-icosa-5,8,11,14-tetraenoate.

## Mass spectra of the synthesized compounds

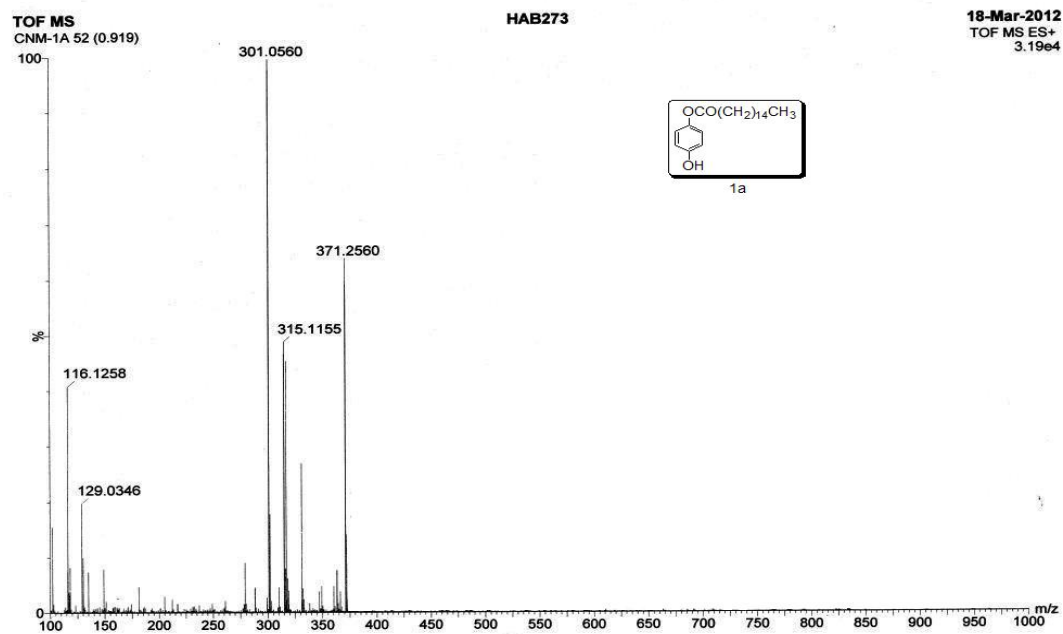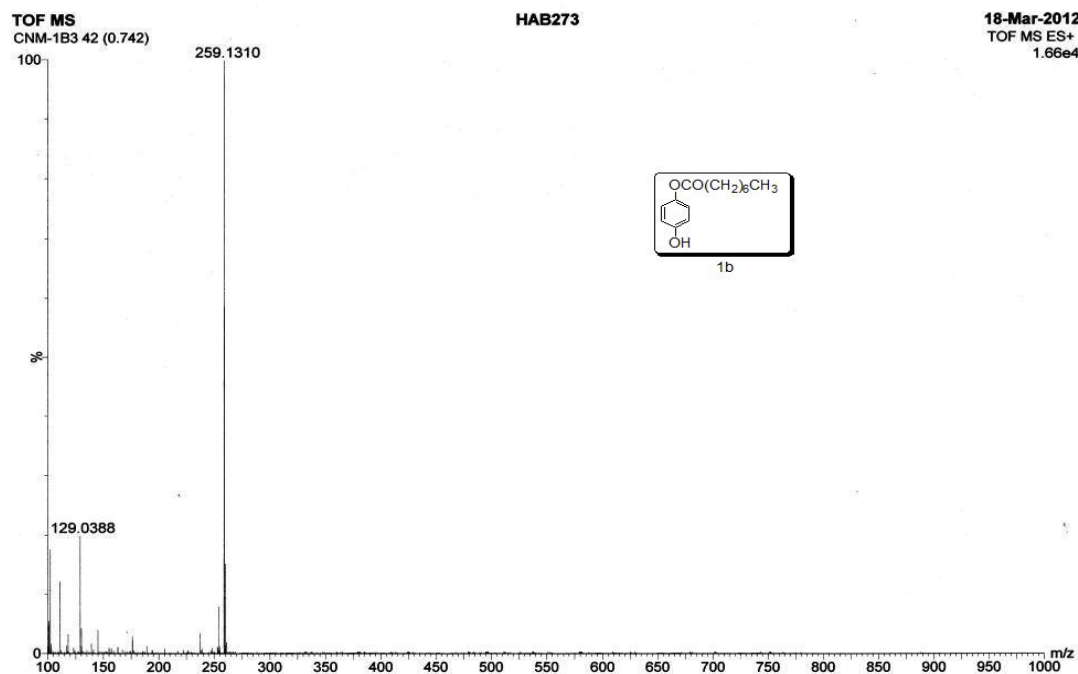

**Figure S27:** Mass spectrum of compound **1a** and **1b**.

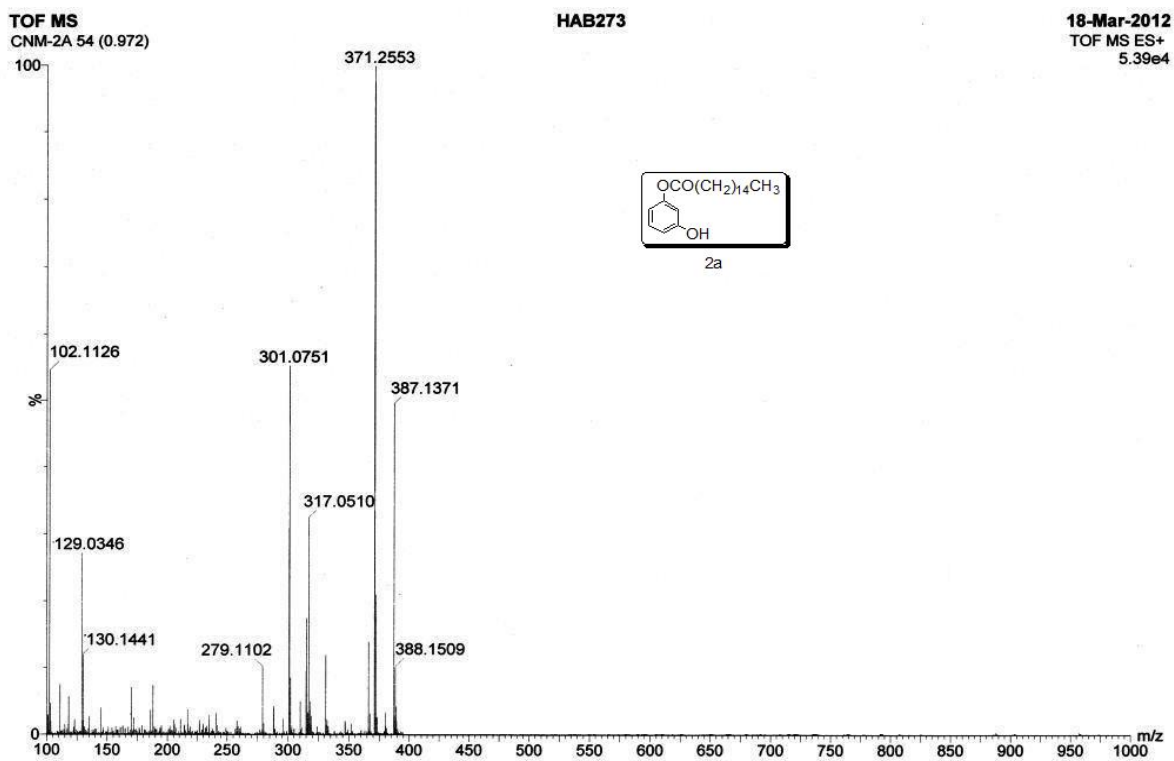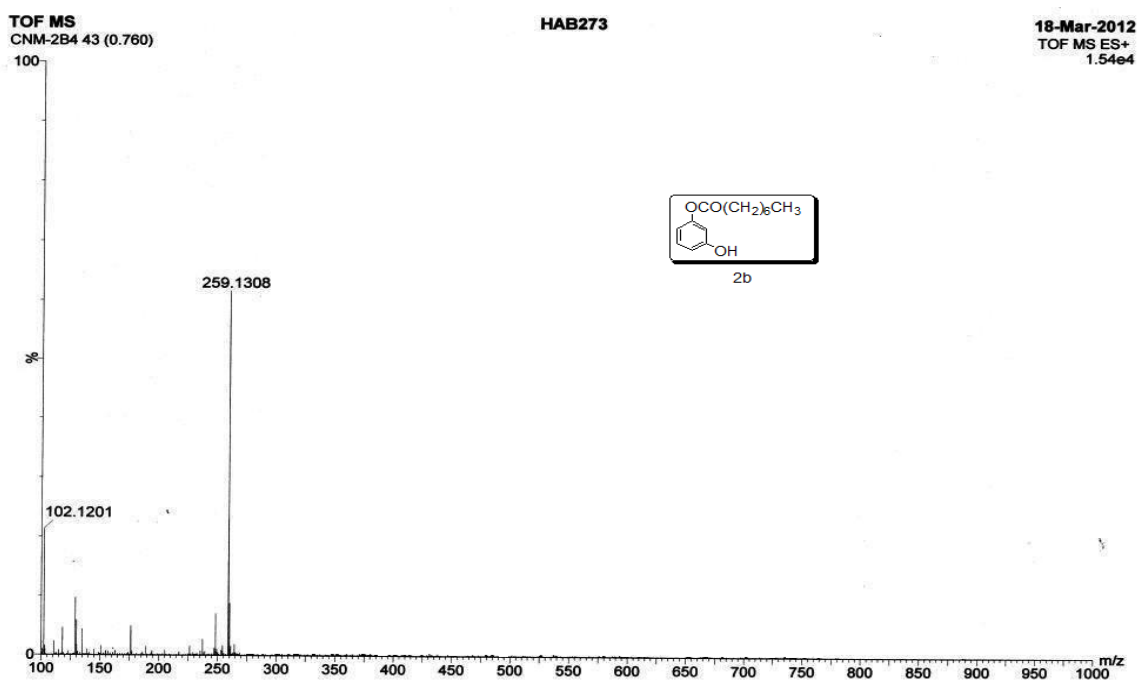

Figure S28: Mass spectrum of compound 2a and 2b.

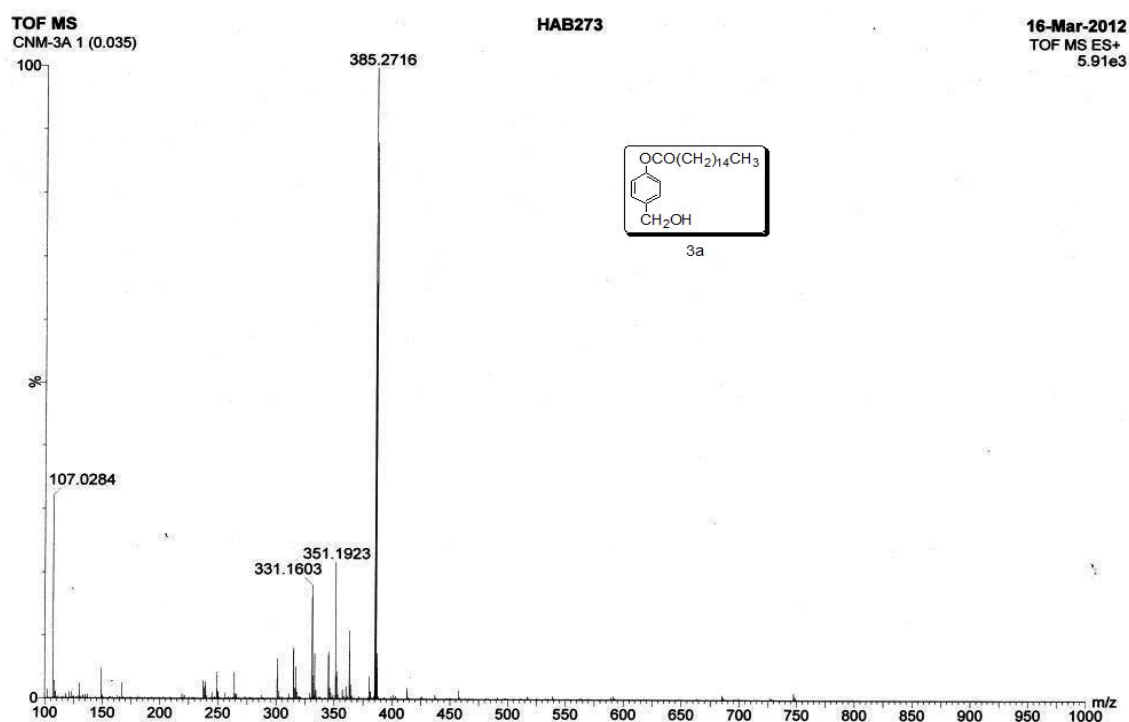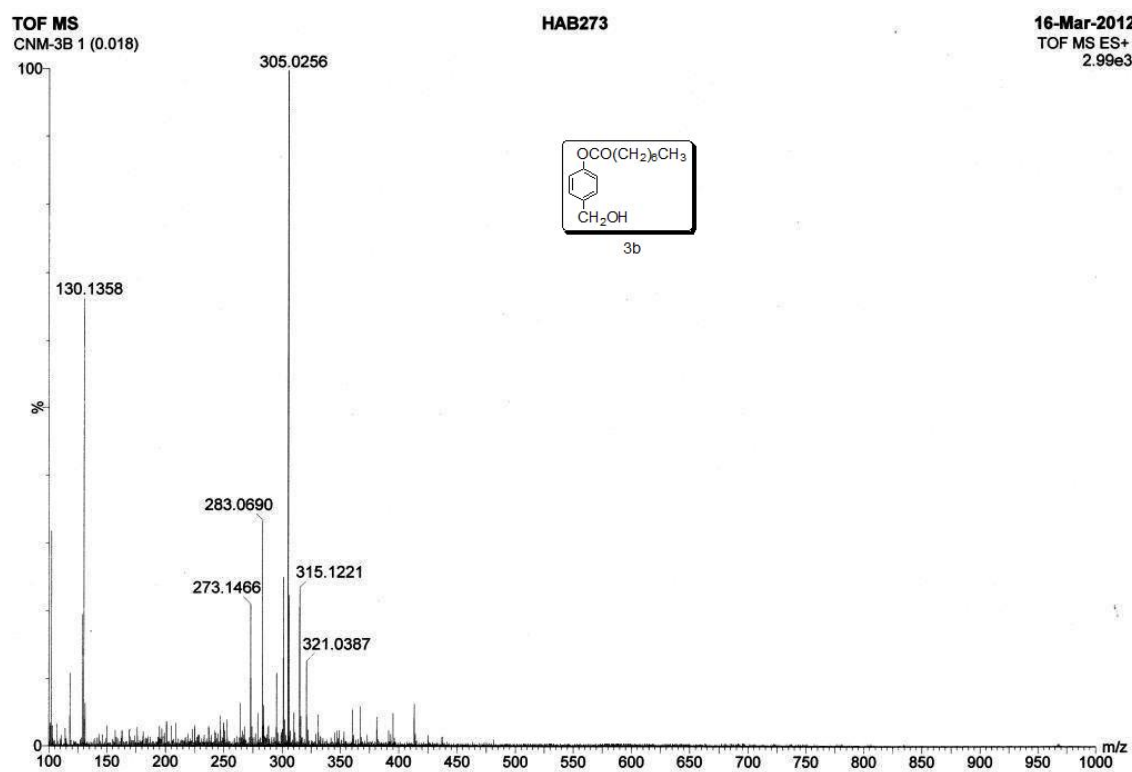

Figure S29: Mass spectrum of compound 3a and 3b.

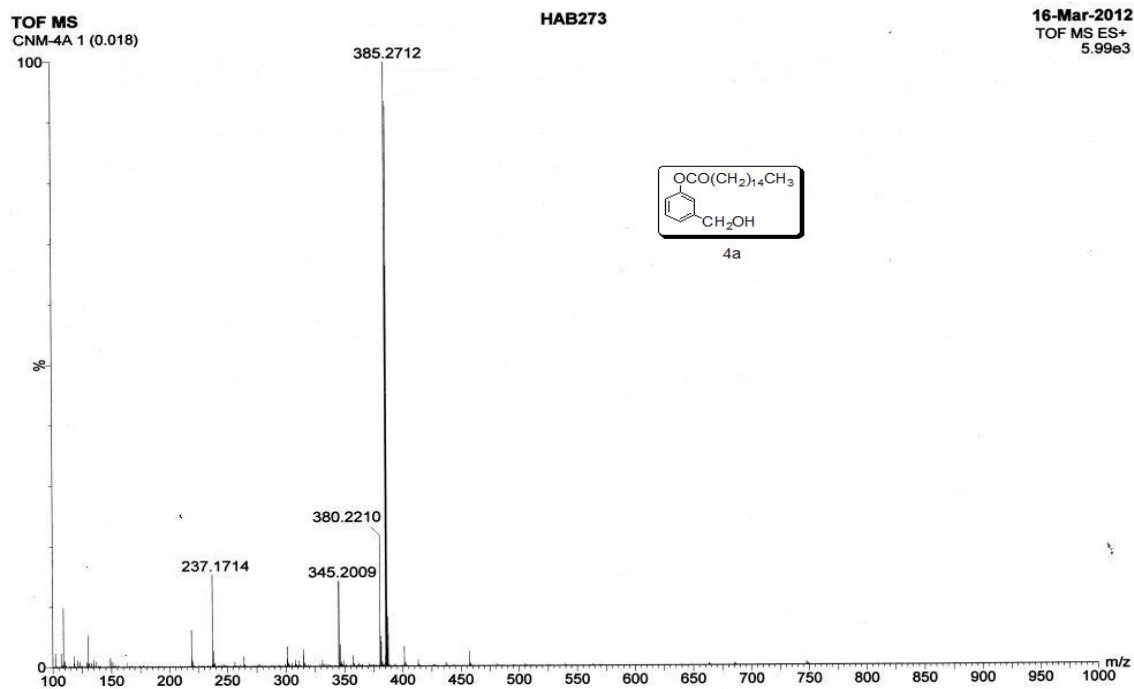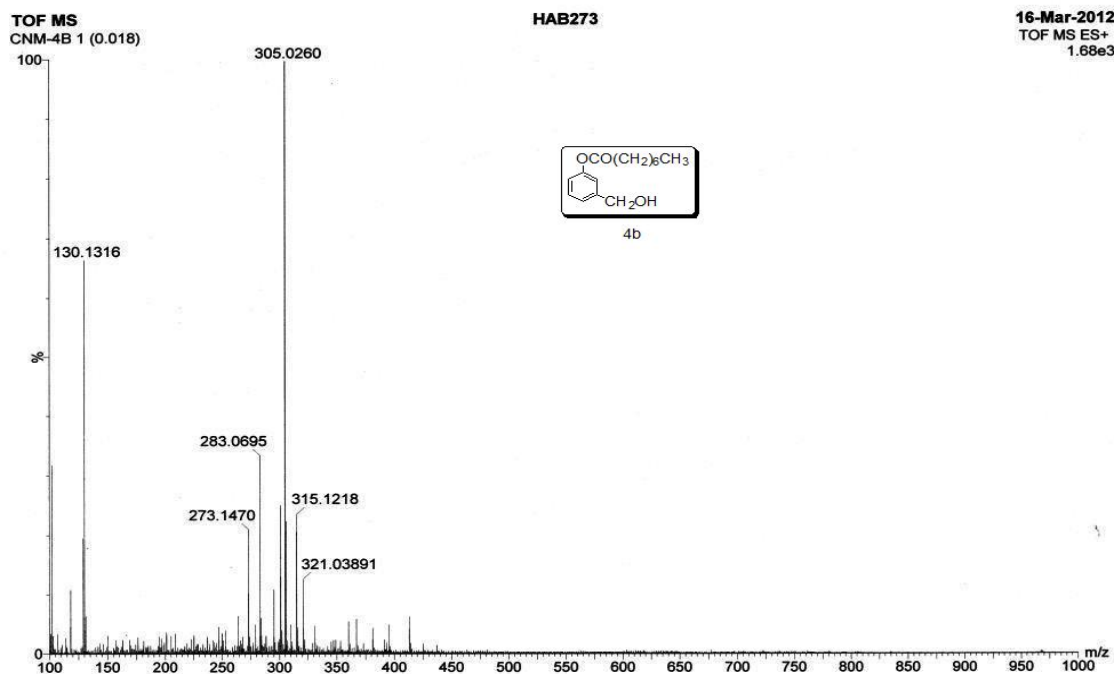

Figure S30: Mass spectrum of compound 4a and 4b.



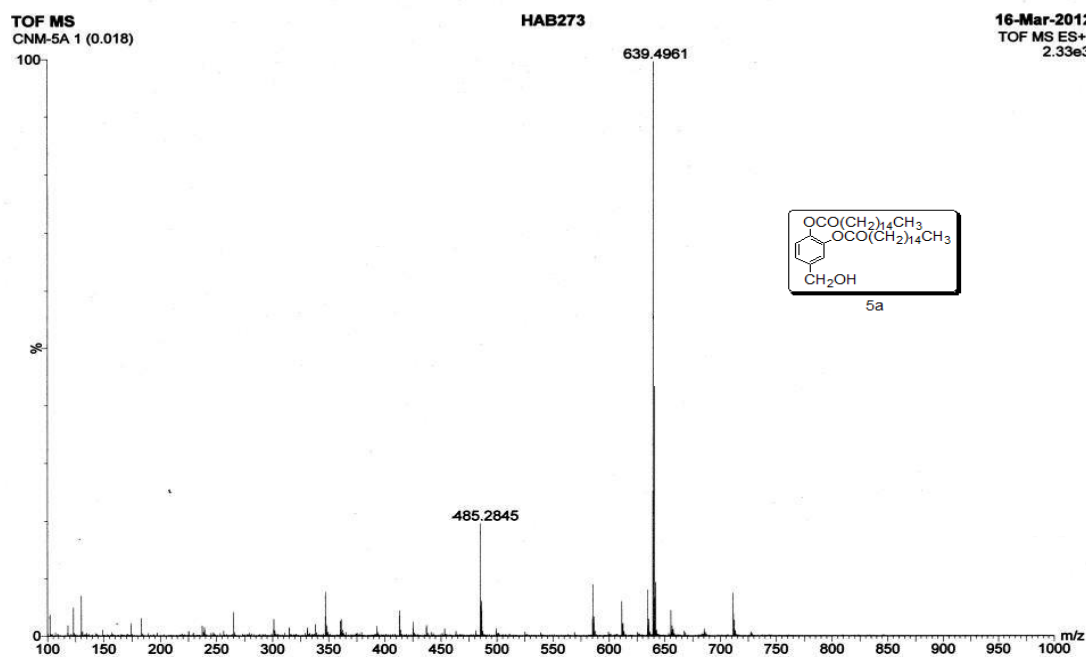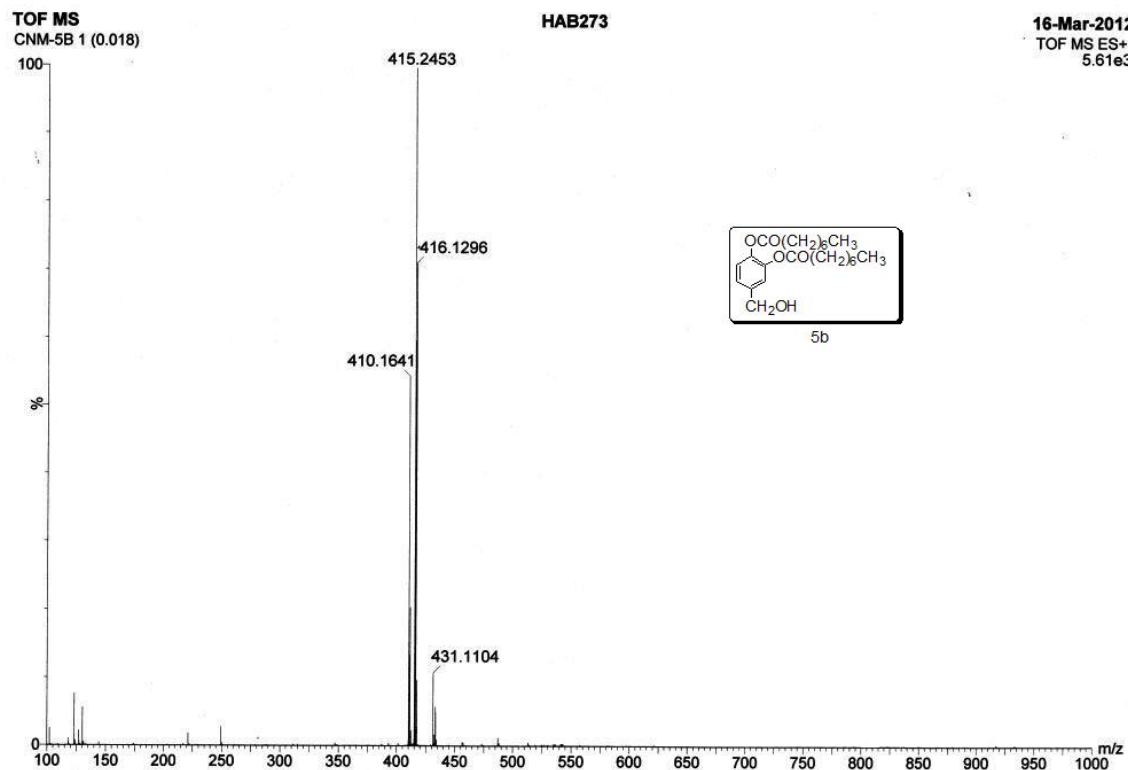

Figure S31: Mass spectrum of compound 5a and 5b.

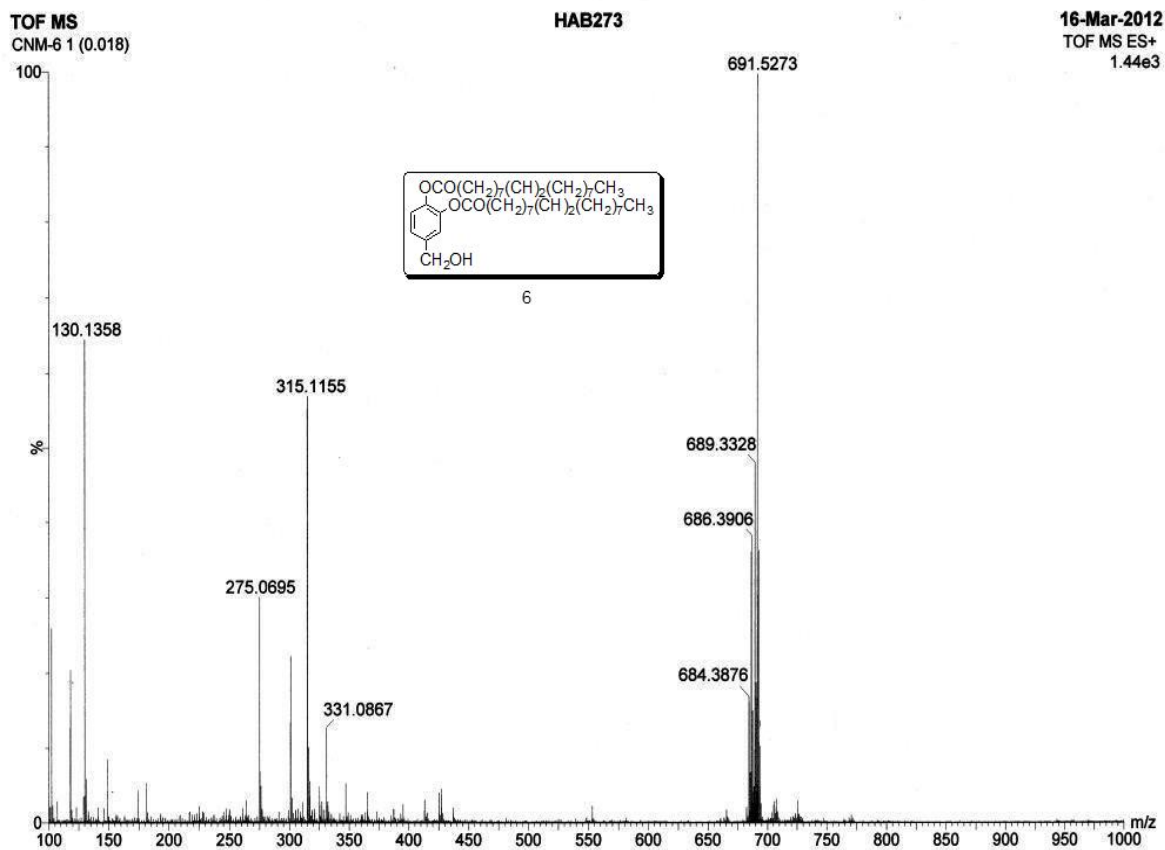

**Figure S32:** Mass spectrum of compound **6**.

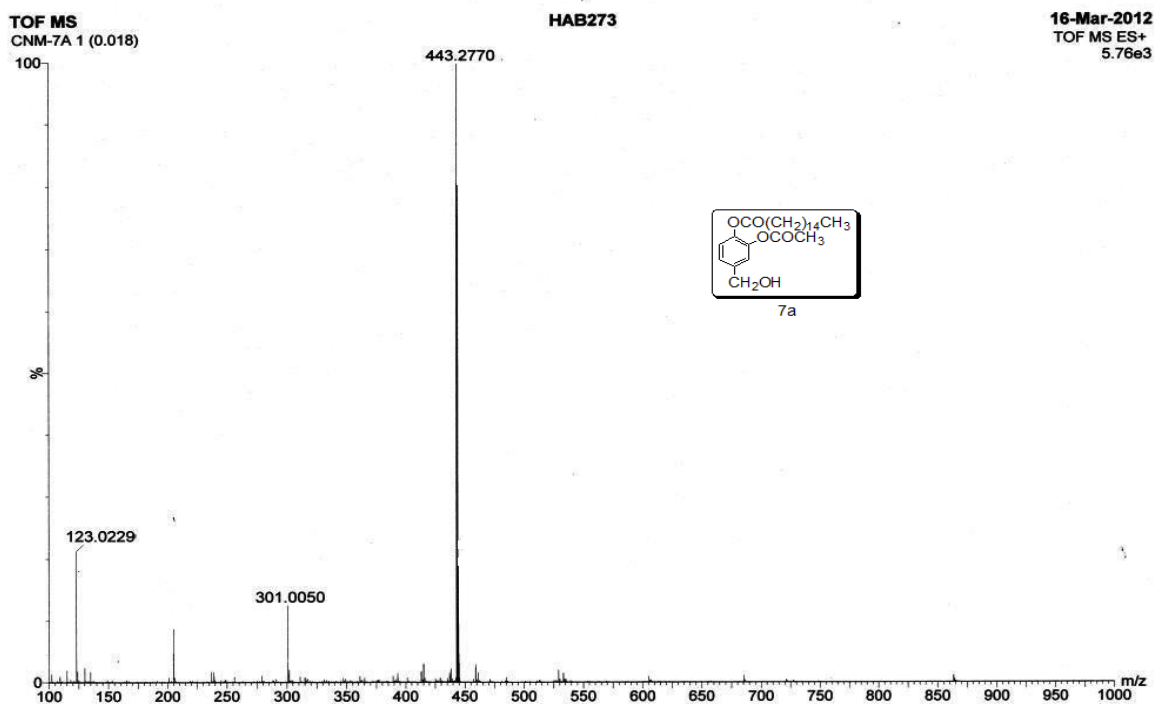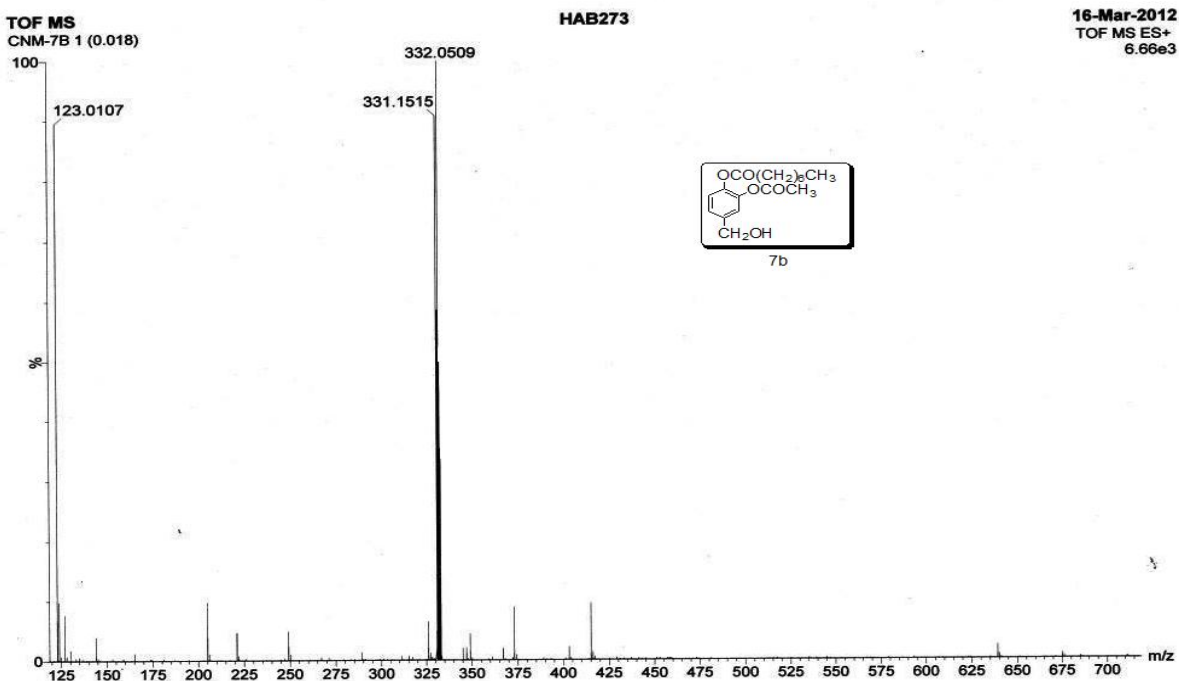

Figure S33: Mass spectrum of compound 7a and 7b.

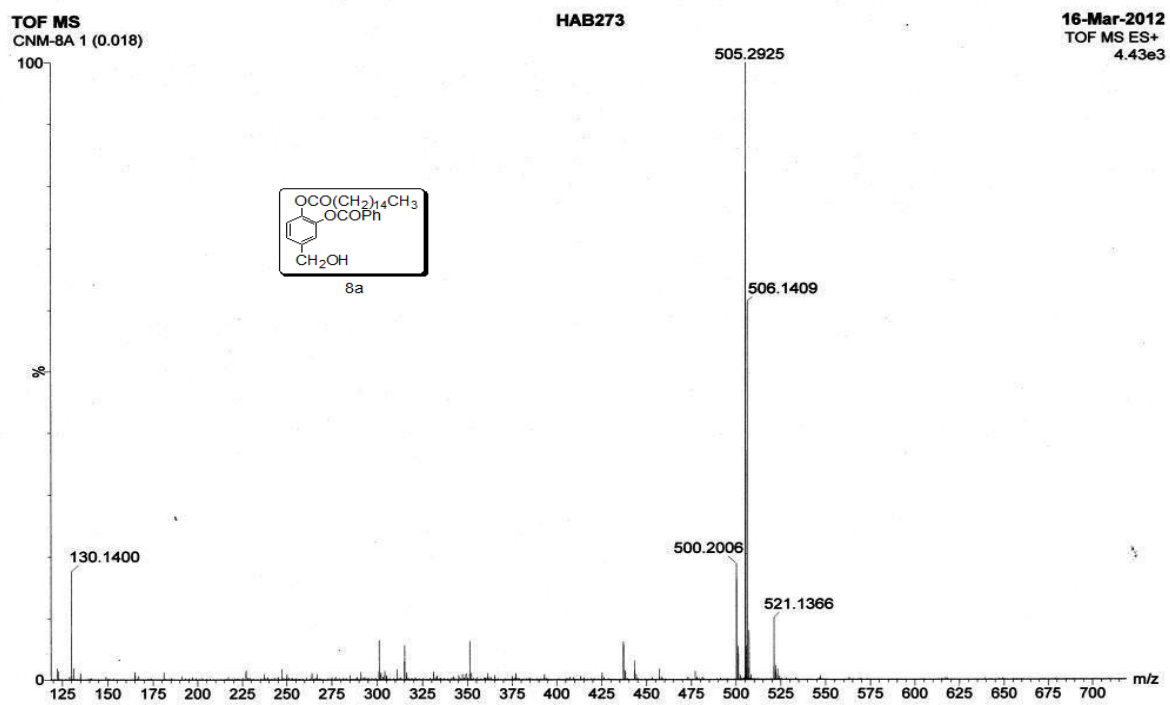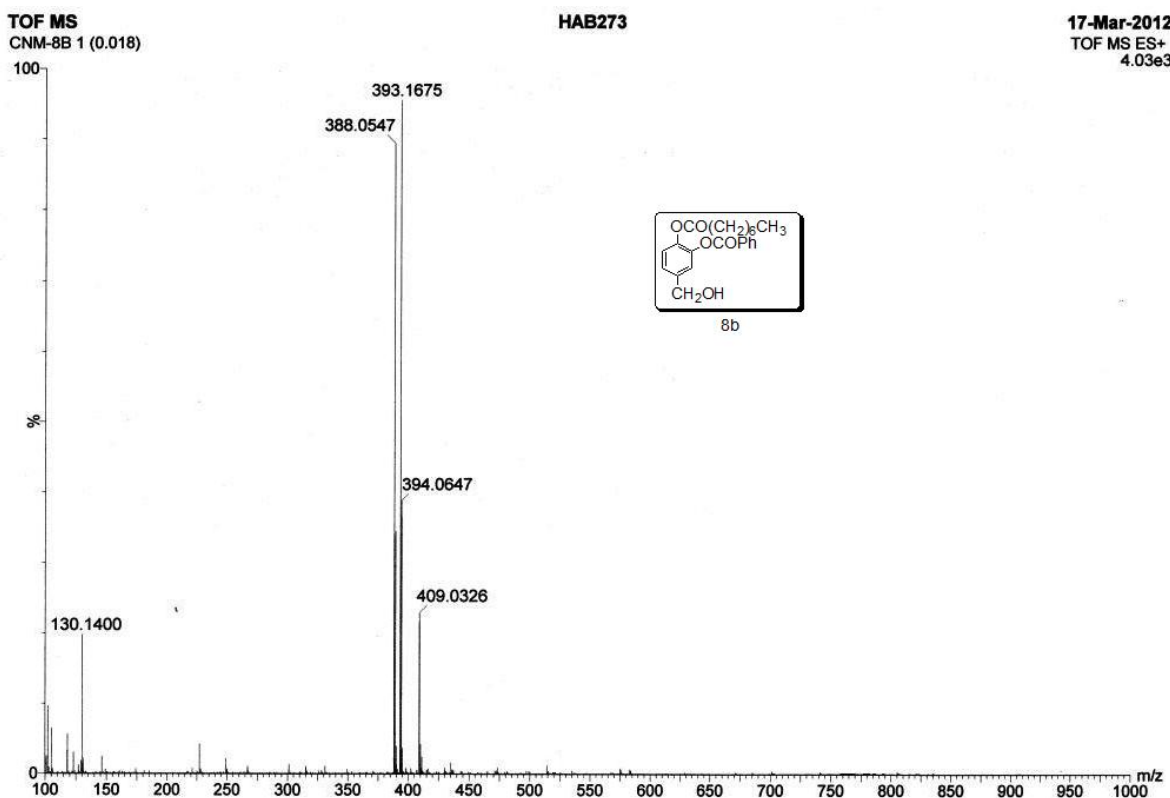

Figure S34: Mass spectrum of compound 8a and 8b.

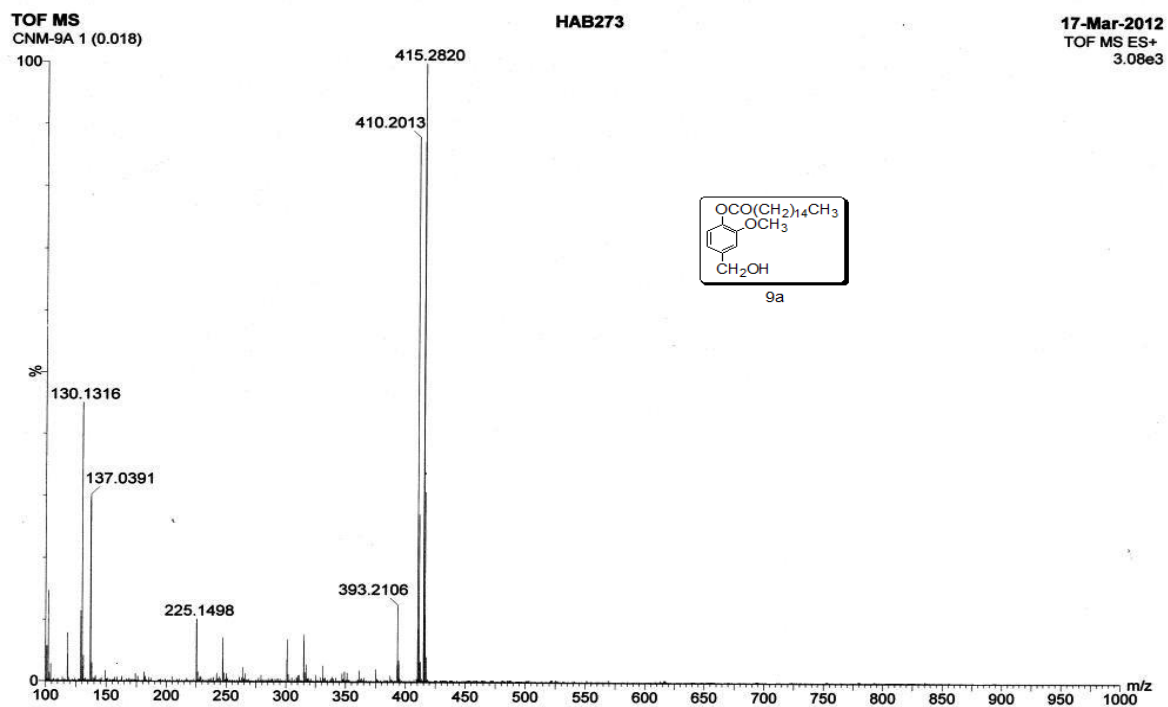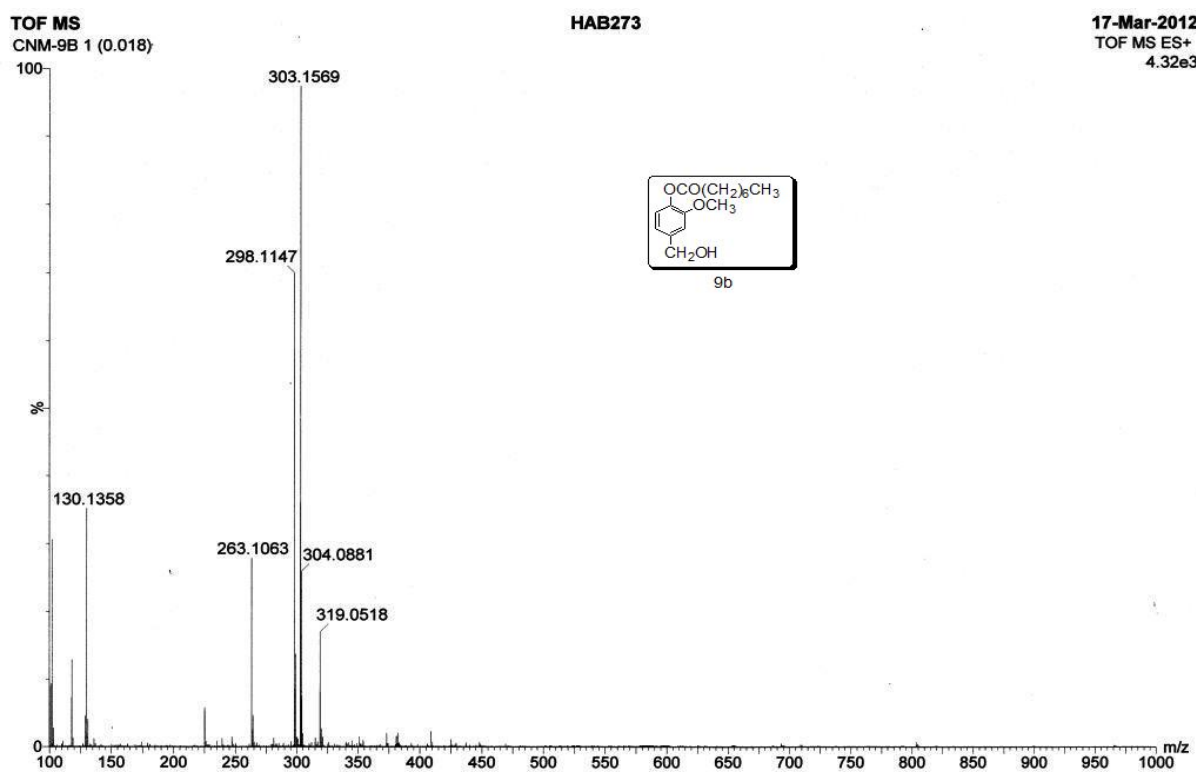

Figure S35: Mass spectrum of compound 9a and 9b.

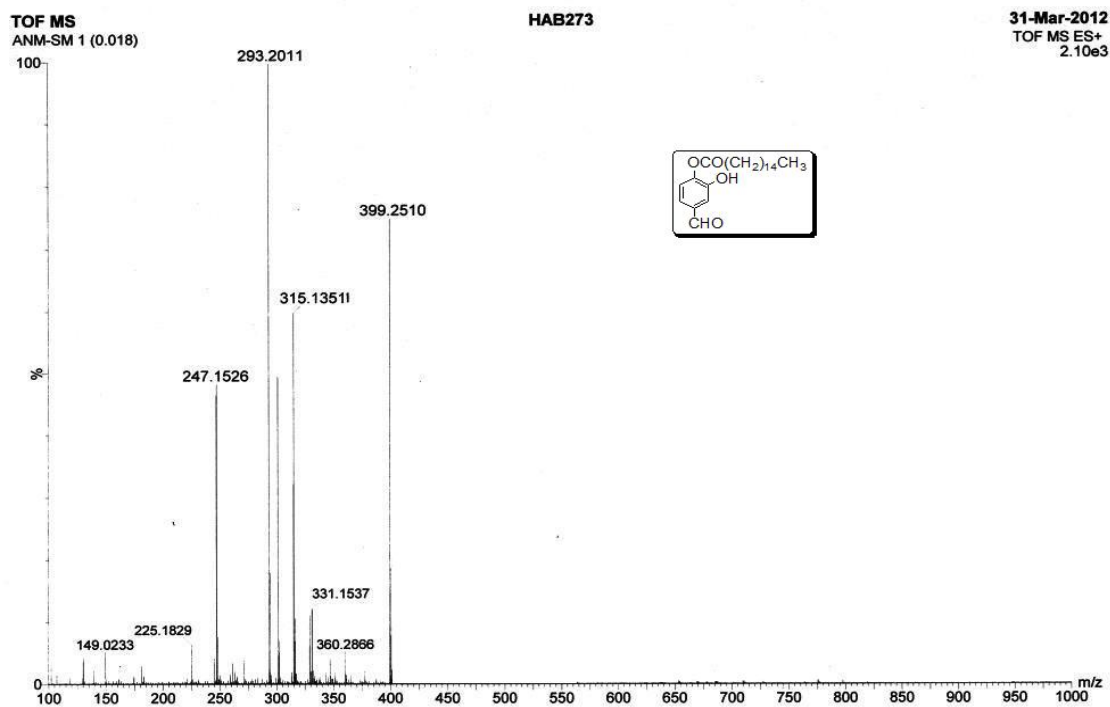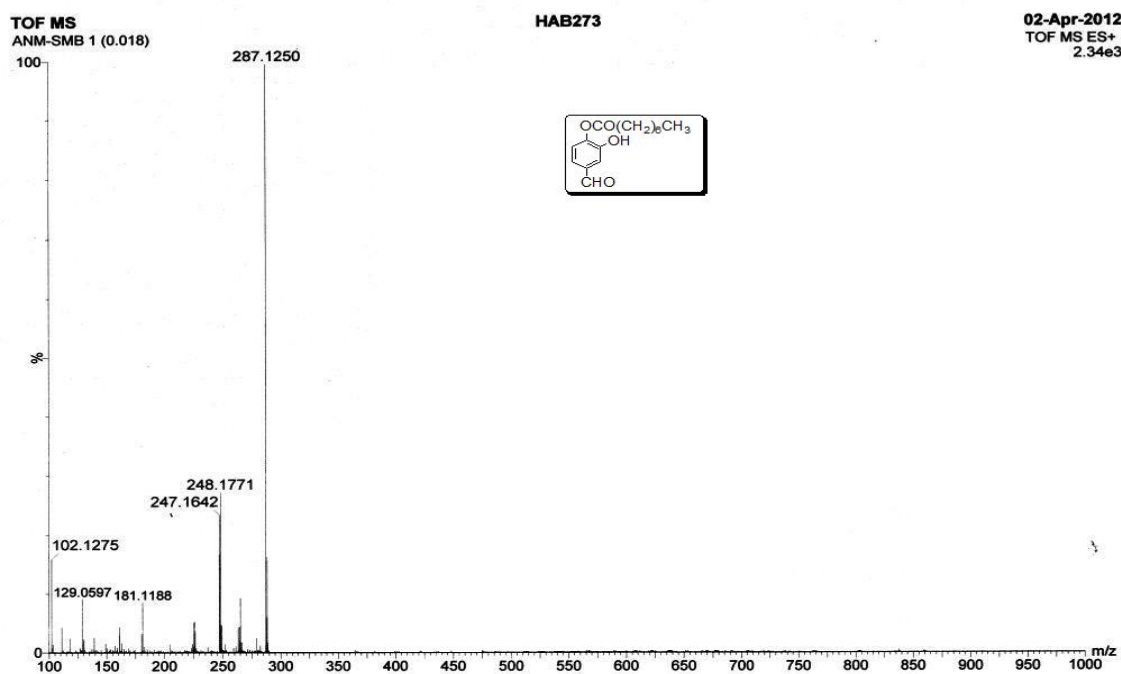

**Figure S36:** Mass spectrum of 4-formyl-2-hydroxyphenyl palmitate and 4-formyl-2-hydroxyphenyl octanoate.

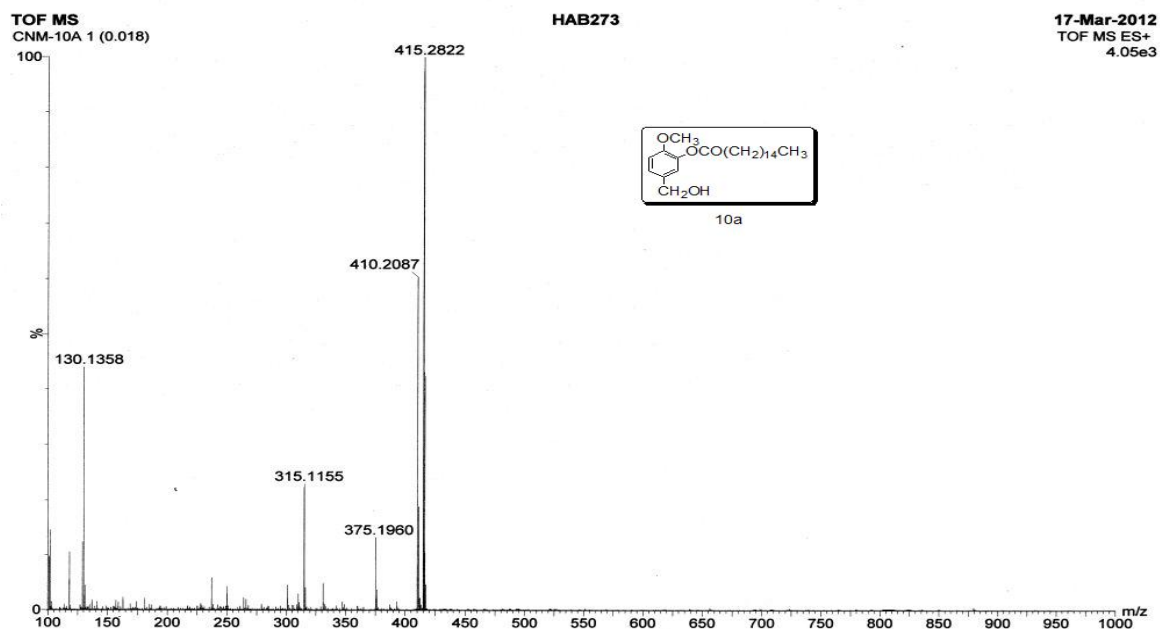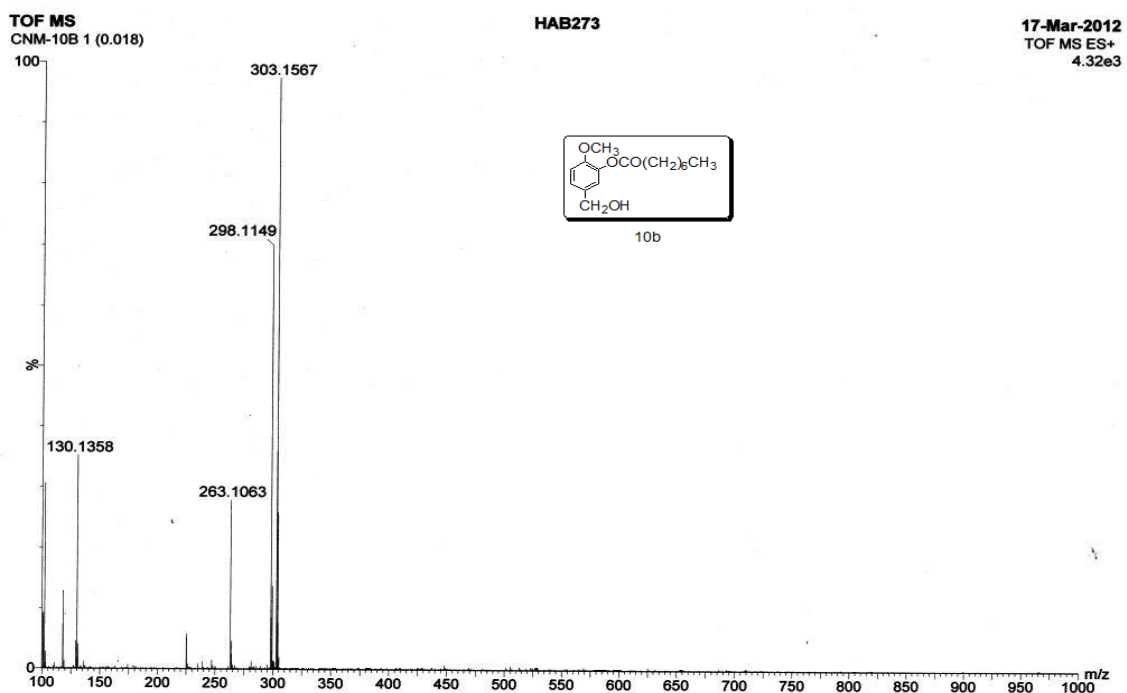

Figure S37: Mass spectrum of compound 10a and 10b.

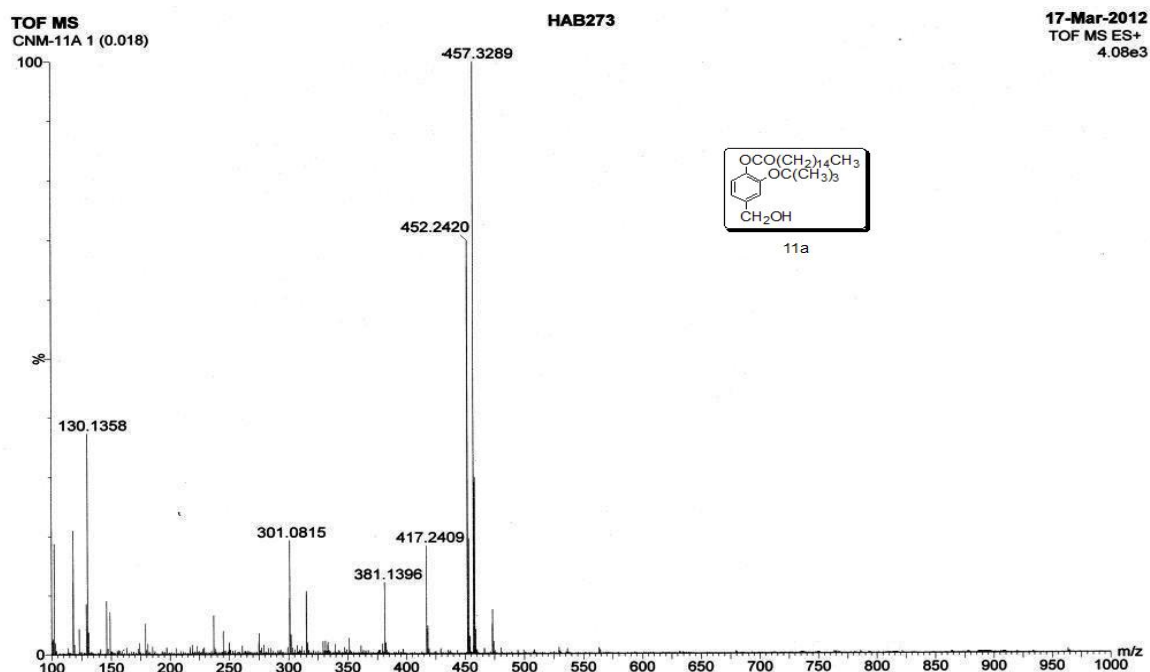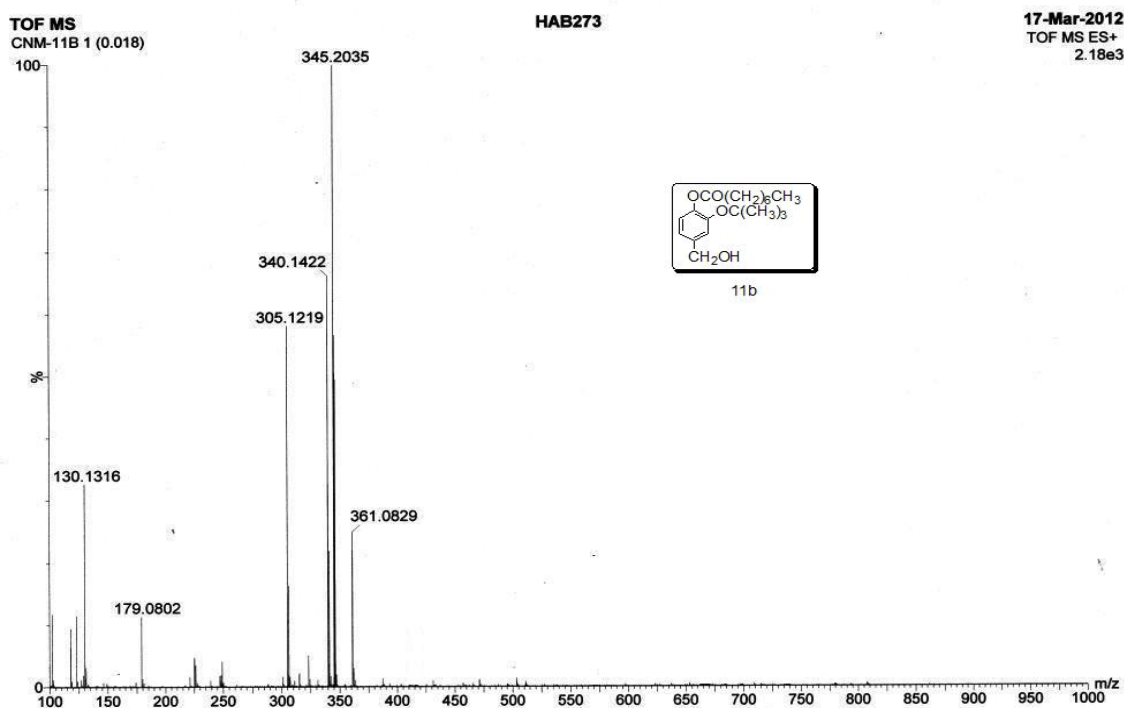

Figure S38: Mass spectrum of compound 11a and 11b.



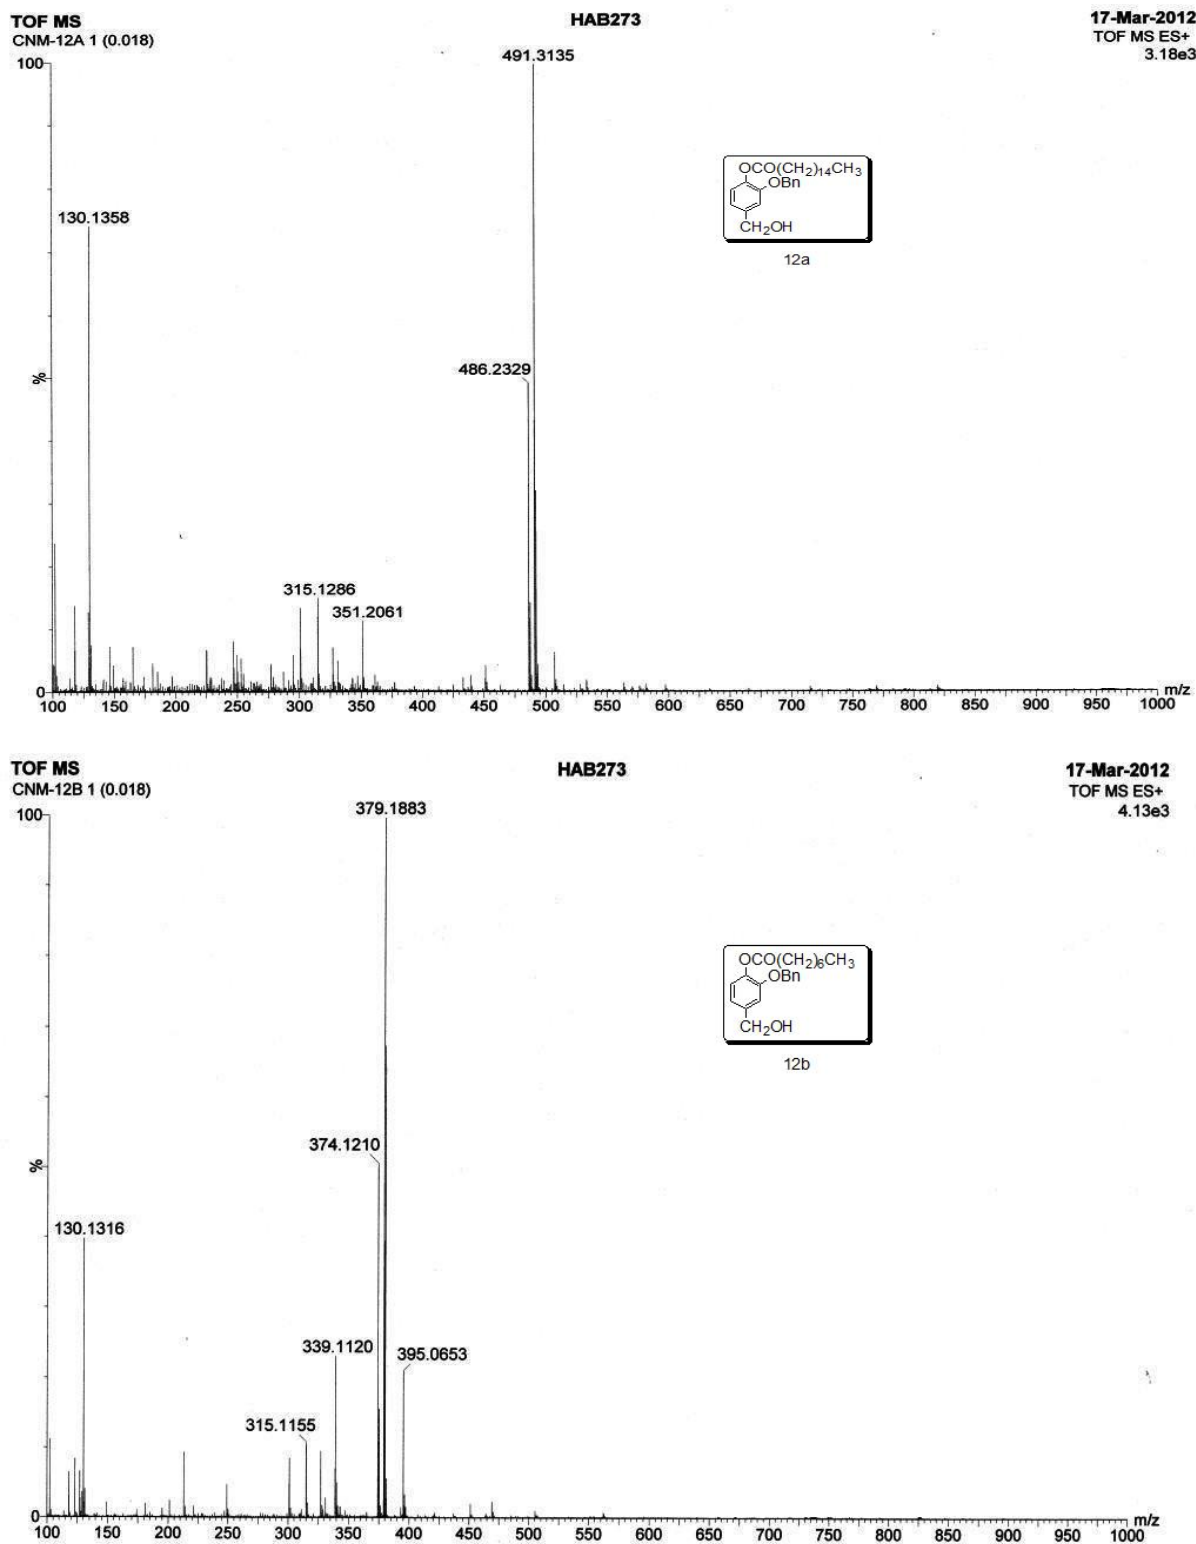

**Figure S39:** Mass spectrum of compound 12a and 12b.
